# **Dystroglycan Maintains Inner Limiting Membrane Integrity to Coordinate Retinal Development**

**Reena Clements<sup>1</sup>, Rolf Turk<sup>3</sup>, Kevin P. Campbell<sup>3</sup>, and Kevin M. Wright<sup>1,2, #</sup>**

1) Neuroscience Graduate Program, 2) Vollum Institute, Oregon Health & Science University, Portland, OR 97239, USA, 3) Howard Hughes Medical Institute, Department of Molecular Physiology and Biophysics, Department of Neurology, Department of Internal Medicine, The University of Iowa Roy J. and Lucille A. Carver College of Medicine, Iowa City, IA USA.

#) Correspondence to Kevin M Wright ([wrightke@ohsu.edu](mailto:wrightke@ohsu.edu)). Vollum Institute, 3181 SW Sam Jackson Park Rd L474 Portland, OR 97239. (503)-494-6955

## **Running Title:**

Dystroglycan regulates retinal development

## **Abstract**

Proper neural circuit formation requires the precise regulation of neuronal migration, axon guidance and dendritic arborization. Mutations affecting the function of the transmembrane glycoprotein dystroglycan cause a form of congenital muscular dystrophy that is frequently associated with neurodevelopmental abnormalities. Despite its importance in brain development, the precise role for dystroglycan in regulating retinal development remains poorly understood. Using a mouse model of dystroglycanopathy (*ISPD<sup>L79\*</sup>*) and conditional *dystroglycan* mutants, we show that dystroglycan is critical for the proper migration, axon guidance and dendritic stratification of neurons in the inner retina. Using genetic approaches, we show that dystroglycan functions in neuroepithelial cells as an extracellular scaffold to maintain the integrity of the retinal inner limiting membrane (ILM). Surprisingly, despite the profound disruptions in inner retinal circuit formation, spontaneous retinal activity is preserved. These results highlight the importance of dystroglycan in coordinating multiple aspects of retinal development.

## 1 **Introduction**

2       The precise lamination of neurons is a common organizing principle of the  
3 vertebrate nervous system and is critical for establishing proper connectivity. In many  
4 regions of the developing nervous system, newly generated neurons migrate in a basal  
5 direction away from apically located proliferative zones. In the developing retina,  
6 progenitor cells localized in the apical neuroepithelium undergo asymmetric cell  
7 divisions to produce a variety of retinal cell types in a sequential manner (Reese, 2011).  
8 Retinal ganglion cells (RGCs), the sole output cells of the retina, are generated first in  
9 early embryonic development, followed by horizontal cells and cones. Rods, amacrine  
10 cells, bipolar cells and Müller glia are the last to differentiate (Bassett and Wallace,  
11 2012; Livesey and Cepko, 2001; Reese, 2011). In contrast to the developing cortex,  
12 birthdate order does not predict the laminar placement of neurons within the retina.  
13 Rather, the retina is organized in three major cellular layers: the apically located outer  
14 nuclear layer (ONL) comprised of rod and cone photoreceptors; the inner nuclear layer  
15 (INL) containing horizontal cells, bipolar cells and amacrine cells; and the basally  
16 located ganglion cell layer containing RGCs and displaced amacrine cells (Bassett and  
17 Wallace, 2012). Two synaptic lamina form postnatally in the retina: the outer plexiform  
18 layer (OPL), which contains synapses between photoreceptors, bipolar cells and  
19 horizontal cells; and the inner plexiform layer (IPL), which contains synapses between  
20 bipolar cells, amacrine cells and RGCs. The molecular cues that direct the stratification  
21 of neuronal subtypes and their processes in the retina remain poorly understood.

22       Unlike the cerebral cortex, where many neurons migrate along the radial glia  
23 scaffold, neuronal migration in the retina does not require contact between neurons and

24 neuroepithelial cells (Reese, 2011). RGCs, bipolar cells and photoreceptors migrate by  
25 nuclear translocation through a basally-directed process, while amacrine cells and  
26 horizontal cells migrate without obvious processes directed towards either the apical or  
27 basal surface of the retina. Basal process contact with the inner limiting membrane  
28 (ILM) is critical for the polarization and migration of RGCs (Randlett et al., 2011). RGC  
29 axons form in the optic fiber layer (OFL), along the laminin-enriched ILM, and direct  
30 their axon growth to the optic disc at the center of the retina (Bao, 2008). The ILM is  
31 made up of various extracellular matrix (ECM) proteins including laminins, Collagen IV,  
32 nidogens, perlecan, and agrin (Taylor et al., 2015; Varshney et al., 2015). Mutations in  
33 specific laminins (Lam $\alpha$ 1, Lam $\beta$ 2 and Lam $\gamma$ 3) or the laminin receptor  $\beta$ 1-Integrin, disrupt  
34 formation of the ILM and organization of the ganglion cell layer (GCL) (Edwards et al.,  
35 2010; Gnanaguru et al., 2013; Pinzon-Duarte et al., 2010; Riccomagno et al., 2014).  
36 How laminins and other ECM proteins are initially organized in the ILM remains unclear.

37 In addition to  $\beta$ 1-Integrin, the transmembrane glycoprotein dystroglycan functions as  
38 a receptor for laminins and other ECM proteins that contain Laminin G (LG) domains  
39 through its extracellular  $\alpha$ -subunit. Dystroglycan also connects to the actin cytoskeleton  
40 through the intracellular domain of its transmembrane  $\beta$ -subunit, which is part of the  
41 dystrophin glycoprotein complex (Moore and Winder, 2010). The extensive  
42 glycosylation of dystroglycan's  $\alpha$ -subunit is essential for its function, with the mature  
43 glycan chains binding to LG motifs present in a number of ECM proteins (Moore and  
44 Winder, 2012). Mutations in one of 17 genes encoding proteins required for the  
45 functional glycosylation of dystroglycan lead to a form of congenital muscular dystrophy  
46 termed dystroglycanopathy (Taniguchi-Ikeda et al., 2016). Patients with

47 dystroglycanopathy can present a wide range of symptoms, and the most severe forms,  
48 Muscle-Eye-Brain disease (MEB) and Walker Warburg Syndrome (WWS), are  
49 accompanied by significant neurological involvement (Godfrey et al., 2011). MEB and  
50 WWS are characterized by cortical malformation (type II lissencephaly), cerebellar  
51 abnormalities, and retinal dysplasias (Dobyns et al., 1989).

52 Cortical malformations in dystroglycanopathies have been well-studied, and reflect  
53 neuronal migration defects that arise from the critical role that dystroglycan plays in  
54 maintaining the architecture of the neuroepithelial scaffold (Moore et al., 2002; Myshra  
55 et al., 2012). In several mouse models of dystroglycanopathy, focal regions of retinal  
56 dysplasia have been observed, with ectopic cells protruding through the ILM (Chan et  
57 al., 2010; Lee et al., 2005; Satz et al., 2008; Takahashi et al., 2011; Takeda et al.,  
58 2003). However, several important questions regarding the role of dystroglycan in  
59 retinal development remain unaddressed. First, is dystroglycan required for the proper  
60 migration and lamination of specific subtypes of retinal neurons? Second, is  
61 dystroglycan required to maintain the ILM as a growth substrate for RGC axons as they  
62 exit the retina? Third, how does the loss of dystroglycan affect the postnatal dendritic  
63 stratification and mosaic spacing of retinal neurons? Finally, how do the retinal  
64 dysplasias present in models of dystroglycanopathy affect the function of the retina?

65 Here, using multiple genetic models, we identify a critical role for dystroglycan in  
66 multiple aspects of retinal development. We show that dystroglycan within the  
67 neuroepithelium is critical for maintaining the structural integrity of the ILM. We provide  
68 *in vivo* evidence that dystroglycan's maintenance of the ILM is required for proper  
69 neuronal migration, axon guidance and the postnatal formation of synaptic lamina

70 specifically within the inner retina. Surprisingly, spontaneous retinal activity appears  
71 unperturbed, despite the dramatic disruption in inner retinal development. Together,  
72 these results provide critical insight into how dystroglycan directs the proper functional  
73 assembly of retinal circuits.

74

## 75 **Results**

76

### 77 **Dystroglycan is required for inner limiting membrane integrity and axon tract** 78 **formation in the developing retina**

79 Dystroglycan plays a critical role in the developing cortex, where it anchors radial  
80 neuroepithelial endfeet to the basement membrane along the pial surface. In the  
81 absence of functional dystroglycan, disruptions in the cortical basement membrane and  
82 detachment of neuroepithelial endfeet lead to profound neuronal migration phenotypes  
83 (Moore et al., 2002; Myshra et al., 2012). In the adult retina, dystroglycan is present in  
84 blood vessels, in RGCs, at ribbon synapses in the OPL, and at the ILM, which serves as  
85 a basement membrane that separates the neural retina from the vitreous space  
86 (Montanaro et al., 1995; Omori et al., 2012). However, the role of dystroglycan in  
87 regulating neuronal migration, axon guidance or dendritic stratification of specific cell  
88 types during retinal development has not been examined in a comprehensive manner.  
89 To address this open question, we first examined the expression pattern of dystroglycan  
90 in the developing retina. Using immunohistochemistry, we observed dystroglycan  
91 expression along radial processes that span the width of the retina, and its selective  
92 enrichment at the ILM from embryonic ages (e13) through birth (P0) (Figure 1A). These  
93 processes are likely a combination of neuroepithelial cells and the basal process of  
94 migrating RGCs. Loss of staining in retinas from an epiblast-specific *dystroglycan*

95 conditional knockout ( $DG^{F/-}; Sox2^{cre}$ ) confirmed the specificity of this expression pattern  
96 (Figure 1A).

97 The first step in the assembly of basement membranes is the recruitment of laminin  
98 polymers to the cell surface by sulfated glycolipids, followed by the stabilization of  
99 laminin polymers by transmembrane receptors (Yurchenco, 2011). To determine  
100 whether dystroglycan is required for the initial formation of the ILM during retinal  
101 development, we utilized two complementary genetic models.  $ISPD^{L79*/L79*}$  mutants,  
102 previously identified in a forward genetic screen, lack the mature glycan chains required  
103 for dystroglycan to bind ligands such as laminin and are a model for severe  
104 dystroglycanopathy (Wright et al., 2012).  $DG^{F/-}; Sox2^{cre}$  conditional mutants lack  
105 dystroglycan in all epiblast-derived tissues and were utilized to confirm that phenotypes  
106 observed in  $ISPD^{L79*/L79*}$  mice are dystroglycan dependent. The enrichment of laminin at  
107 the ILM appeared normal in early retinal development at e13 in both  $ISPD^{L79*/L79*}$  and  
108  $DG^{F/-}; Sox2^{cre}$  mutants (Figure 1B-D), indicating that dystroglycan is not required for the  
109 initial formation of the ILM. However, at e16, we observed a profound loss of laminin  
110 staining and degeneration of the ILM across the entire surface of the retina in  
111  $ISPD^{L79*/L79*}$  and  $DG^{F/-}; Sox2^{cre}$  mutants (Figure 1C-D, Supplemental Figure 1). The  
112 loss of ILM integrity in  $ISPD^{L79*/L79*}$  and  $DG^{F/-}; Sox2^{cre}$  mutants was accompanied by the  
113 inappropriate migration of retinal neurons, resulting in the formation of an ectopic layer  
114 of neurons protruding into the vitreous space.

115 Following the initial polymerization of laminin on cell surfaces, additional ECM  
116 proteins bind and crosslink the nascent basement membrane to increase its stability  
117 and complexity. Examination of  $ISPD^{L79*/L79*}$  mutant retinas at P0 revealed a loss of the

118 ECM proteins Collagen IV (red), and Perlecan (green), coinciding with the disruptions in  
119 Laminin (purple) (Figure 1E). These data suggest that while dystroglycan is not required  
120 for the initial formation of the ILM, it is essential for its maturation and maintenance.  
121 Furthermore, dystroglycan is critical for the ILM to function as a structural barrier to  
122 prevent the ectopic migration of neurons into the vitreous space.

123 The hyaloid vasculature in the embryonic retina normally regresses as the retinal  
124 vascular plexus emerges through the optic nerve head beginning around birth (Fruttiger,  
125 2007). Previous studies have found that defects in ILM integrity disrupt retinal  
126 vasculature development (Edwards et al., 2010; Lee et al., 2005; Takahashi et al., 2011;  
127 Tao and Zhang, 2016). In agreement with these findings, we observe that at embryonic  
128 ages in *ISPD<sup>L79\*/L79\*</sup>* mutant retinas, the hyaloid vasculature becomes embedded within  
129 the ectopic retinal neuron layer (Supplemental Figure 2A), and fails to regress at P0  
130 (Supplemental Figure 2B). In addition, the emergence of the retinal vasculature is  
131 stunted in *ISPD<sup>L79\*/L79\*</sup>* mutants (Supplemental Figure 2B). This is likely due to defects in  
132 the migration of astrocytes, which also emerge from the optic nerve head just prior to  
133 endothelial cells and require an intact ILM for their migration (Tao and Zhang, 2016).

134 We previously showed that the organization of the basement membrane by  
135 dystroglycan provides a permissive growth substrate for axons in the developing spinal  
136 cord (Wright et al., 2012). In addition, contact with laminin in the ILM stabilizes the  
137 leading process of newly generated RGCs to direct the formation of the nascent axon  
138 (Randlett et al., 2011). These axons remain in close proximity to the ILM as they extend  
139 centrally towards the optic nerve head, forming the OFL. Therefore, we examined  
140 whether the disruptions in the ILM affected the guidance of RGC axons in *ISPD<sup>L79\*/L79\*</sup>*



141 and *DG<sup>F/-</sup>*; *Sox2<sup>cre</sup>* mutants. At e13, axons in both control and mutant retinas formed a  
142 dense and continuous network in the basal retina, directly abutting the ILM (Figure 2A).  
143 In contrast, at e16 (Figure 2B) and P0 (Figure 2C), RGC axons in *ISPD<sup>L79\*/L79\*</sup>* and *DG<sup>F/-</sup>*  
144 ; *Sox2<sup>cre</sup>* mutants were highly disorganized, exhibiting both defasciculation (asterisks)  
145 and hyperfasciculation (arrowheads).

146 To gain further insight into the specific defects that occur in RGC axons, we used a  
147 flat mount retina preparation. Regardless of their location in the retina, all RGCs orient  
148 and extend their axons towards the center of the retina, where they exit the retina  
149 through the optic nerve head (Bao, 2008). In control retinas at e16 (Figure 2D, left  
150 panel) and P0 (Figure 2E, left panel) axons traveled towards the optic nerve head in  
151 fasciculated, non-overlapping bundles. By e16 RGC axons in both *ISPD<sup>L79\*/L79\*</sup>* and  
152 *DG<sup>F/-</sup>*; *Sox2<sup>cre</sup>* mutants were highly defasciculated and a large proportion frequently  
153 grew in random directions without respect to their orientation to the optic nerve head,  
154 resulting in their failure to exit the retina. However, it is important to note that some  
155 axons retained their appropriate centrally-orientated trajectory, which may be indicative  
156 of RGC axons that have already traversed the retina to the optic nerve head prior to the  
157 degeneration of the ILM (Figure 1) (Petros et al., 2008). Together, these data show that  
158 proper growth and guidance of RGC axons to the optic nerve head requires  
159 dystroglycan to maintain an intact ILM as a growth substrate.

160

161 **Dystroglycan is required for axonal targeting, dendritic lamination, and cell**  
162 **spacing in the postnatal retina**

163 Our results in *ISPD<sup>L79\*/L79\*</sup>* and *DG<sup>F/-</sup>; Sox2<sup>cre</sup>* mutants demonstrate that  
164 dystroglycan is required for ILM integrity and to prevent the ectopic migration of neurons  
165 into the vitreous (Figure 1), consistent with other models of dystroglycanopathy.  
166 However, the specific neuronal subtypes affected in models of dystroglycanopathy are  
167 unknown, and the role of dystroglycan in regulating postnatal aspects of retinal  
168 development has not been examined. The synaptic layers of the retina develop  
169 postnatally, with tripartite synapses between the photoreceptors, bipolar cells and  
170 horizontal cells forming in the OPL, and synapses between bipolar cells, amacrine cells  
171 and retinal ganglion cells forming in the IPL. The development of these synaptic layers  
172 requires the precise stratification of both axons and dendrites that occurs between P0  
173 and P14. Since *ISPD<sup>L79\*/L79\*</sup>* and *DG<sup>F/-</sup>; Sox2<sup>cre</sup>* mutant mice exhibit perinatal lethality,  
174 we deleted *dystroglycan* selectively from the early neural retina and ventral forebrain  
175 using a *Six3<sup>Cre</sup>* driver (Furuta et al., 2000) (Supplemental Figure 3).

176 We first confirmed that *DG<sup>F/-</sup>; Six3<sup>cre</sup>* mice recapitulated the retinal phenotypes  
177 identified in *ISPD<sup>L79\*/L79\*</sup>* and *DG<sup>F/-</sup>; Sox2<sup>cre</sup>* mice. We observed a degeneration of the  
178 ILM (laminin, purple) accompanied by ectopic migration of neurons into the vitreous,  
179 and abnormal fasciculation and guidance of RGC axons at P0 (Figure 3A-B). While  
180 fully penetrant, the ILM degeneration and neuronal migration defects in *DG<sup>F/-</sup>; Six3<sup>cre</sup>*  
181 mice were milder than in *DG<sup>F/-</sup>; Sox2<sup>cre</sup>* mice, exhibiting a patchiness that was  
182 distributed across the retina (Supplemental Figure 3C). The defects in *DG<sup>F/-</sup>; Six3<sup>cre</sup>*  
183 mice contrast the finding that conditional deletion of *dystroglycan* with *Nestin<sup>cre</sup>* does not  
184 affect the overall structure of the retina (Satz et al., 2009). We find that this difference is  
185 likely due to the onset and pattern of *Cre* expression, as recombination of a *Cre*-

186 dependent reporter (*Rosa26-lox-stop-lox-TdTomato; Ai9*) occurred earlier and more  
187 broadly in *Six3<sup>Cre</sup>* mice than in *Nestin<sup>Cre</sup>* mice (Supplemental Figure 3).

188 *DG<sup>F/-</sup>; Six3<sup>Cre</sup>* mice are healthy and survive into adulthood, allowing us to examine  
189 the role of dystroglycan in postnatal retinal development. We analyzed *DG; Six3<sup>Cre</sup>*  
190 retinas at P14 when migration is complete and the laminar specificity of axons and  
191 dendrites has been established (Morgan and Wong, 1995). The overall architecture of  
192 the ONL appeared unaffected by the loss of dystroglycan in *DG<sup>F/-</sup>; Six3<sup>Cre</sup>* mice, and cell  
193 body positioning of photoreceptors appeared similar to controls (Supplemental Figure  
194 4). Within the INL, the laminar positioning of rod bipolar cell bodies (PKC, Figure 3C),  
195 cone bipolar cell bodies (SCGN, Figure 3D) and horizontal cells (arrows, Calbindin,  
196 Figure 3F) and the targeting of their dendrites to the OPL appeared normal in *DG<sup>F/-</sup>;*  
197 *Six3<sup>Cre</sup>* mutants. However, bipolar cell axons that project towards the inner retina and  
198 are normally confined to the synaptic layers in the IPL extended aberrant projections  
199 into the ectopic clusters (Figure 3C).

200 In contrast, subsets of amacrine and ganglion cells labeled by ChAT (starburst  
201 amacrine cells, Figure 3E), calbindin (Figure 3F) calretinin (Figure 3G) that are normally  
202 confined to the INL and GCL were present in the ectopic clusters that protrude into the  
203 vitreous space. Glycinergic amacrine cells (GlyT1, Figure 3H), whose cell bodies are  
204 normally found in a single layer within the INL, were also present within ectopic clusters.  
205 Compared to the OPL, which appeared grossly normal, dendritic stratification within the  
206 IPL in *DG<sup>F/-</sup>; Six3<sup>Cre</sup>* mutant retinas was highly disrupted. The normally tightly laminated  
207 dendritic strata appeared expanded (Figure 3E), fragmented (Figure 3E-G) and  
208 occasionally lacked an entire lamina (Figure 3F). These defects were restricted to

209 regions of the retina where ectopic neuronal clusters were present, whereas regions of  
210 the *DGF<sup>-/-</sup>; Six3<sup>cre</sup>* mutant retina with normal cellular migration and lamination also had  
211 normal dendritic stratification (Supplemental Figure 3). These results demonstrate that  
212 the ectopic clusters consisted of multiple subtypes of amacrine cells and ganglion cells  
213 that normally reside in the INL and GCL, and that the disorganization of the dendritic  
214 strata are likely secondary to the cell migration defects.

215 Over the course of retinal development, multiple cell types, including horizontal  
216 cells and amacrine cells, develop mosaic spacing patterns that ensure cells maintain  
217 complete and non-random coverage over the surface of the retina (Wassle and  
218 Riemann, 1978). This final mosaic pattern is established by both the removal of excess  
219 cells through apoptosis and the lateral dispersion of “like-subtype” cells via homotypic  
220 avoidance mechanisms (Kay et al., 2012; Li et al., 2015). To determine whether the  
221 defects in establishing proper positioning of retinal subtypes in *DGF<sup>-/-</sup>; Six3<sup>cre</sup>* mutants  
222 extends to mosaic spacing, we performed nearest neighbor analysis. For horizontal  
223 cells, which exhibit normal lamination in *DGF<sup>-/-</sup>; Six3<sup>cre</sup>* mutant retinas, we observed a  
224 small, but significant reduction in cellular density (Figure 5F). Despite the reduction in  
225 the density of horizontal cells, nearest neighbor curves between controls and mutants  
226 are the same shape, indicating that horizontal cell mosaics are maintained in  
227 dystroglycan mutants (Figure 4A, B, Two-Way ANOVA,  $p < 0.01$ ).

228 ChAT positive starburst amacrine cells are present in two distinct lamina that form  
229 mosaic spacing patterns independent from one another. Consistent with this, ChAT  
230 labeled cells in the INL showed normal mosaic cell spacing (Figure 4C, top, Figure 4D,  
231 top, Two-Way ANOVA,  $p > 0.05$ ). In contrast, the GCL contained prominent ChAT

232 positive clusters that corresponded to the ectopic protrusions that extend into the  
233 vitreous, resulting in a decrease in cell spacing as determined by nearest neighbor  
234 analysis, (Figure 4C, bottom, Figure 4D, bottom, Two-Way ANOVA,  $p < 0.01$ ). These  
235 results demonstrate that laminar migration defects in  $DG^{F/-}; Six3^{cre}$  mutants degrade the  
236 mosaic spacing of cells in the GCL, and that contact with an intact ILM is likely required  
237 for the proper lateral dispersion of these cells.

238

### 239 **Deletion of dystroglycan leads to a loss of photoreceptors, horizontal cells and** 240 **ganglion cells**

241 During development, normal physiological apoptotic cell death during the first two  
242 postnatal weeks plays an important role in retinal maturation (Young, 1984). This  
243 process is critical for establishing the proper numbers and spacing of some subtypes of  
244 cells across the mature retina, as well as removing cells that fail to connect to  
245 appropriate synaptic targets (Braunger et al., 2014). Degeneration of the ILM during  
246 development can lead to a reduction in the number of ganglion cells, and previous  
247 analysis of dystroglycanopathy mutants has noted thinning of the retina (Chan et al.,  
248 2010; Halfter et al., 2005; Lee et al., 2005; Satz et al., 2008; Takahashi et al., 2011). In  
249 agreement with these results, we observed that the retinas of  $DG^{F/-}; Six3^{cre}$  mutants are  
250 thinner (Figure 3, 5). However, the specific cell types affected by the loss of  
251 dystroglycan in the retina are unknown.

252 To investigate the mechanism by which loss of dystroglycan contributes to retinal  
253 thinning, we began by measuring the distance between the edges of the inner and outer  
254 retina in control and  $DG^{F/-}; Six3^{cre}$  mutants by DAPI staining and found that there was a

255 significant reduction in overall retinal thickness by approximately 20% in mutants  
256 (Figure 5A, blue, Figure 5B, t test,  $p < 0.01$ ). We next investigated which specific cell  
257 types contribute to retinal thinning. In the outer retina, the thickness of the photoreceptor  
258 layer (recoverin, Figure 5A, green, Figure 5C, t-test,  $p < 0.05$ ) was reduced by  
259 approximately 20% and the density of horizontal cells had a small, yet significant  
260 reduction in *DG<sup>F/-</sup>; Six3<sup>cre</sup>* mutants (calbindin, Figure 5F, t-test,  $p < 0.05$ ). In contrast, the  
261 thickness of the bipolar cell layer (Chx10, Figure 5A, purple, Figure 5D, t-test,  $p < 0.05$ )  
262 was normal. In the inner retina, there was a 50% reduction in the density of ganglion  
263 cells (Figure 5G, H, t-test,  $p < 0.0001$ ), while the density of ChAT+ starburst amacrine  
264 cells in both the GCL and INL was normal in *DG<sup>F/-</sup>; Six3<sup>cre</sup>* mutants (Figure 5E, t-test,  
265  $p < 0.05$ ). Thus, the loss of photoreceptors, horizontal cells and RGCs contribute to the  
266 overall thinning of the retina.

267 To determine whether the reduction in photoreceptors, horizontal cells and RGCs in  
268 the absence of dystroglycan was the result of increased cell death, we examined early  
269 postnatal ages when normal physiological apoptosis occurs in the retina. In *DG<sup>F/-</sup>;*  
270 *Six3<sup>cre</sup>* mutants at P0, we observed an increased number of cleaved caspase-3 positive  
271 cells that was restricted to the ganglion cell layer (Figure 5I, J, t-test,  $p < 0.05$ ) and was  
272 not observed in other layers of the retina (data not shown). We also examined  
273 *ISPD<sup>L79\*/L79\*</sup>* mutants to assess GCL apoptosis in a dystroglycanopathy model. Prior to  
274 the normal period of physiological apoptosis in the retina we observed a massive  
275 increase in caspase-3 positive cells at e16 in mutants (Figure 5J t-test,  $p < 0.0001$ ) that  
276 continued through P0 (Figure 5I, J, t-test,  $p < 0.0001$ ). These results led us to conclude

277 that the dramatic loss of RGCs in  $DG^{F/-}; Six3^{cre}$  mutants is due to increased apoptotic  
278 cell death.

279

## 280 **Dystroglycan functions non-cell autonomously as a scaffold in the developing** 281 **retina**

282 We next sought to provide mechanistic insight into how dystroglycan regulates  
283 retinal development *in vivo*. In the cerebral cortex, the loss of dystroglycan results in  
284 breaches of the pial basement membrane and detachment of neuroepithelial endfeet  
285 from the pial surface, depriving neurons of a migratory scaffold. In addition, the cortical  
286 basement membrane defects cause the mis-positioning of Cajal-Retzius cells, which are  
287 the source of Reelin that regulates somal translocation of neurons as they detach from  
288 the neuroepithelial scaffold (Nakagawa et al., 2015). Deletion of *dystroglycan*  
289 specifically from postmitotic neurons does not result in a migration phenotype (Satz et  
290 al., 2010), supporting a model in which the cortical migration phenotypes arise due to  
291 disrupted interactions between the basement membrane and neuroepithelial scaffold. In  
292 contrast to the cerebral cortex, the basal migration of RGCs does not involve contact  
293 with the neuroepithelial scaffold. Instead, newly born RGCs migrate via somal  
294 translocation using an ILM-attached basal process that eventually becomes the nascent  
295 axon (Icha et al., 2016; Randlett et al., 2011). Dystroglycan's expression in RGCs  
296 (Montanaro et al., 1995), and the restriction of neuronal migration and axon guidance  
297 defects to the GCL raise the possibility that dystroglycan could be functioning cell-  
298 autonomously in the basal processes of newly born RGCs. To test this possibility, we  
299 generated  $DG^{F/-}; Islet1^{cre}$  conditional knockouts. *Islet1* is expressed in the majority of

300 ganglion cells as they differentiate from the retinal progenitor pool (Pan et al., 2008).  
301 Analysis of *Isl1<sup>cre</sup>* mice at e13 confirmed recombination occurs in the majority of newly  
302 born ganglion cells, but not in neuroepithelial progenitors (Supplemental Figure 5).  
303 Examination of *DG<sup>F/-</sup>; Isl1<sup>cre</sup>* mutants indicated that deletion of *dystroglycan* selectively  
304 from RGCs did not affect ILM integrity (Figure 6A, middle panel). Neuronal migration  
305 (Figure 6A, C and D, middle panels), axon guidance (Figure 6A and B, middle panels)  
306 and the stratification of dendrites in the IPL (Figures 6 C-D, middle panels) all appeared  
307 normal in *DG<sup>F/-</sup>; Isl1<sup>cre</sup>* mutants. These results demonstrate that dystroglycan is not  
308 required within RGCs themselves during retinal development.

309 Dystroglycan consists of two subunits that play distinct roles in the overall function  
310 of the protein. The extracellular  $\alpha$ -subunit is heavily glycosylated and functions as an  
311 extracellular scaffold by binding to extracellular matrix components such as laminin. The  
312  $\beta$ -subunit contains a transmembrane and intracellular domain, and can bind directly to  
313 dystrophin and other modifiers of the actin cytoskeleton as well as initiate intracellular  
314 signaling cascades (Moore and Winder, 2010). The intracellular domain of dystroglycan  
315 is required for the localization of dystrophin to the ILM, and mice lacking the intracellular  
316 domain of dystroglycan (*DG<sup>- $\beta$ cyt</sup>*) (Satz et al., 2009) or the predominant retinal isoform of  
317 dystrophin (*Mdx<sup>3Cv</sup>*) (Blank et al., 1999) have abnormal scotopic electroretinograms,  
318 suggesting a defect in retinal function. While these mice do not have any disruptions in  
319 the ILM or gross malformations in the retina, whether dystroglycan signaling through  
320 dystrophin is required for neuronal migration, axon guidance or dendritic stratification  
321 has not been examined. Consistent with the original report, examination of the ILM and  
322 overall architecture of the retina is normal in *DG<sup>- $\beta$ cyt</sup>* mice. In addition, we find that



323 neuronal migration, axon guidance and stratification of dendritic lamina are unaffected  
324 in *DG<sup>-/βcyt</sup>* mice (Figure 6A-D, right panel). Therefore, intracellular signaling, including  
325 through dystrophin, is not required for these aspects of retinal development. Taken  
326 together with our results in *DG<sup>F/-</sup>; Isl1<sup>cre</sup>* mutants, these findings indicate that  
327 dystroglycan primarily functions in neuroepithelial cells as an extracellular scaffold to  
328 regulate the structural integrity of the ILM. The progressive degeneration of the ILM then  
329 leads to secondary defects including aberrant migration, axon guidance and dendritic  
330 stratification that primarily affect the inner retina.

331

### 332 **Dystroglycan is dispensable for the generation of spontaneous retinal waves**

333 One of the critical functions for laminar targeting in neural circuit development is to  
334 ensure that the axons and dendrites of appropriate cell types are in physical proximity to  
335 one another during synaptogenesis. In addition to regulating the laminar positioning of  
336 neurons in the cortex and retina, dystroglycan is required for the development of a  
337 subset of inhibitory synapses in the brain (Fruh et al., 2016). Therefore, we investigated  
338 the possibility that the loss of dystroglycan disrupts synapse formation in the retina.  
339 Previous studies have shown that ribbon synapses in the OPL are dysfunctional in the  
340 absence of dystroglycan or its ligand pikachurin (Sato et al., 2008). These synapses are  
341 normal at the resolution of light microscopy, but electron microscopy reveals that  
342 dystroglycan and pikachurin are required for the insertion of bipolar cell dendrite tips  
343 into ribbon synapse invaginations (Omori et al., 2012). Consistent with these results, we  
344 found that pre- and post-synaptic markers for ribbon synapses appear normal at the  
345 resolution of light microscopy (Figure 7A). In the inner retina, markers for excitatory

346 synapses (VGLUT1, Figure 7B) and inhibitory synapses (VGAT, Figure 7C) were  
347 present in the IPL, but were also present in the mis-localized ectopic cell clusters that  
348 protrude into the vitreous (asterisks). This finding is similar to a recent study in which  
349 mice lacking the Cas family of intracellular adaptor proteins express synaptic markers  
350 localized to aberrant neuronal ectopia that protrude into the vitreous (Riccomagno et al.,  
351 2014). Therefore, these results suggest that mis-laminated neurons in the retina are  
352 still able to recruit synaptic partners, despite their abnormal location.

353 The presence of synaptic markers in ectopic neuronal clusters in the inner retina  
354 does not guarantee normal function of these neurons. Recording synaptic activity in  
355 RGCs in response to light stimuli in *DG<sup>F/-</sup>; Six3<sup>cre</sup>* mutants is not feasible due the  
356 requirement for dystroglycan at photoreceptor ribbon synapses. We instead analyzed  
357 retinal waves, which are spontaneous bursts of activity that propagate across the retina  
358 prior to eye opening and are independent of light stimulation. During early postnatal  
359 development, these waves are initiated by acetylcholine (ACh) release from starburst  
360 amacrine cells and propagate along the starburst amacrine cell network prior to  
361 transmission to RGCs (Xu et al., 2016). In *DG<sup>F/-</sup>; Six3<sup>cre</sup>* mutants, ChAT positive  
362 starburst amacrine cells are present in normal numbers, and while they are normally  
363 localized and mosaically spaced in the INL, they are profoundly disorganized in the  
364 GCL. Therefore, we expected that these defects might affect the propagation of retinal  
365 waves through the starburst amacrine cell and RGC network. As disruptions in the ILM  
366 in *DG<sup>F/-</sup>; Six3<sup>cre</sup>* mutants would lead to unequal loading of cell permeable calcium  
367 indicators, we utilized the genetically-encoded calcium indicator GCaMP6f crossed onto  
368 the *DG; Six3<sup>cre</sup>* line to visualize retinal waves.

369 Retinal waves in control *DG<sup>F/+</sup>; Six3<sup>cre</sup>; R26-LSL-GCaMP6f* retinas at P1-P2 were  
370 robust and had similar spatiotemporal features (size, rate of propagation, refractory  
371 period) to waves measured using cell-permeable calcium indicators (Arroyo and Feller,  
372 2016). Consistent with previous reports, there is a broad distribution of wave size in  
373 control retinas (Figures 8A, 8C). Neighboring waves do not overlap with one another,  
374 but rather tile the retinal surface during the two-minute imaging period. To our surprise,  
375 retinal waves were present and appeared grossly normal in *DG<sup>F/-</sup>; Six3<sup>cre</sup>; R26-LSL-*  
376 *GCaMP6f* mutants (Figure 8B, D). Waves in control and mutant retinas exhibited a  
377 similar distribution in wave size (Figure 8 E, F), and the average wave size showed no  
378 statistical difference. The rate of wave propagation showed a similar distribution  
379 between controls and mutants. The average rate of wave propagation showed a small,  
380 but statistically significant, decrease (Wilcoxon Rank Sum test,  $p < 0.05$ ). Thus, despite  
381 the dramatic disorganization of ChAT positive starburst amacrine cells in the GCL of  
382 *DG<sup>F/-</sup>; Six3<sup>cre</sup>* mutants, the generation and propagation of retinal waves persisted.

383

## 384 **Discussion**

385

386 Defects in retinal structure and function are commonly observed in human patients  
387 with dystroglycanopathy, and are recapitulated in mouse models of dystroglycanopathy  
388 (Chan et al., 2010; Lee et al., 2005; Satz et al., 2008; Satz et al., 2009; Takahashi et al.,  
389 2011; Takeda et al., 2003). However, the mechanism of dystroglycan function in the  
390 retina and the consequence of its loss on specific cell types are poorly understood. Our  
391 study establishes a critical role for dystroglycan in regulating neuronal migration in order  
392 to establish laminar architecture and mosaic spacing in the inner retina. In the absence

393 of functional dystroglycan, the retinal ILM undergoes rapid and progressive  
394 degeneration, leading to the formation of cellular ectopias in the vitreous space and  
395 defects in intraretinal axon guidance. In the postnatal retina, these migration defects  
396 result in the mis-localization of multiple subtypes of GCL and INL cells into cellular  
397 ectopias and disrupt the mosaic spacing of cells in the GCL. Mechanistically, we show  
398 that these defects are exclusively due to dystroglycan's function as an extracellular  
399 scaffold, as mice lacking the intracellular domain of dystroglycan ( $DG^{-/\beta\text{cyt}}$ ) appear  
400 phenotypically normal. Furthermore, dystroglycan functions non-cell autonomously, as  
401 selective deletion of *dystroglycan* from postmitotic RGCs ( $DG; Isl1^{\text{cre}}$ ) did not affect ILM  
402 integrity, neuronal migration or axon guidance. Despite the dramatic disruptions in  
403 cellular lamination in the GCL and dendritic stratification in the IPL in  $DG; Six3^{\text{cre}}$   
404 mutants, dystroglycan appears dispensable for the formation of synapses and the  
405 generation of spontaneous, light-independent activity in the retina.

406

#### 407 **Temporal requirement for dystroglycan during retinal development.**

408 Using two genetic models for the complete loss of functional dystroglycan ( $ISPD^{\text{L79*}}$   
409 and  $DG; Sox2^{\text{Cre}}$ ), we demonstrated that after the ILM forms, it rapidly degenerates in  
410 the absence of dystroglycan. In  $DG; Six3^{\text{cre}}$  mutants, in which broad recombination  
411 occurs throughout the retina by e13, a milder degeneration of the ILM occurs. In  
412 contrast, the ILM appears grossly normal in  $DG; Nestin^{\text{cre}}$  mutants in which broad  
413 recombination does not occur until later stages (Satz et al., 2009) (Supplemental Figure  
414 3). These results suggest that dystroglycan is not required for the formation of the

415 nascent ILM, but rather plays a critical, yet transient, role in maintaining ILM structure as  
416 it expands to accommodate the growing retina.

417 Recruitment of laminin is a critical early step in the assembly of the ILM, and several  
418 laminin mutants have disruptions in ILM integrity (Edwards et al., 2010; Gnanaguru et  
419 al., 2013; Pinzon-Duarte et al., 2010). The localization of laminin to the early ILM even  
420 in the complete absence of dystroglycan raises the possibility that other laminin  
421 receptors, such as  $\beta$ -1 Integrin, may compensate for the loss of dystroglycan. Mice  
422 lacking  $\beta$ -1 Integrin in the retina exhibit a similar defect to *dystroglycan* mutants, with  
423 normal ILM formation followed by rapid degeneration, supporting the possibility of  
424 redundancy between dystroglycan and  $\beta$ -1 Integrin (Riccomagno et al., 2014).  
425 Surprisingly however, mice in which both dystroglycan and  $\beta$ -1 Integrin are deleted from  
426 the retina (*DG; ItgB1; Six3<sup>Cre</sup>*) still formed an ILM, and exhibited similar phenotypic  
427 severity to *DG; Six3<sup>Cre</sup>* mutant retinas (unpublished observations). These results  
428 demonstrate that both dystroglycan and  $\beta$ -1 Integrin are dispensable, and sulfated  
429 glycolipids alone are likely sufficient for the recruitment of laminin during the initial  
430 formation of the ILM.

431

### 432 **The ILM is required for neuronal migration in the retina**

433 The role of dystroglycan has been extensively studied in the developing cortex,  
434 where it regulates the attachment of the radial glial endfeet to the pial basement  
435 membrane (Myshrall et al., 2012). The degeneration of the radial glia processes and the  
436 ectopic clustering of Cajal-Retzius neurons, the primary source of reelin in the  
437 developing cortex, are the earliest observable pathological features in models of

438 dystroglycanopathy (Booler et al., 2016; Nakagawa et al., 2015). The loss of a radial  
439 migration scaffold and the abnormal distribution of reelin are thought to be the principal  
440 drivers of structural brain defects in dystroglycanopathy. In contrast to the cortex, birth  
441 order does not predict the laminar positioning of retinal neurons, retinal neuron  
442 migration does not involve contact with the neuroepithelial scaffold, and there is no cue  
443 analogous to reelin to signal the termination retinal neuron migration. Therefore, while  
444 our results demonstrate that dystroglycan functions primarily in neuroepithelial cells in  
445 the retina, the functional implications are distinct from its role in cortical neuroepithelial  
446 cells.

447 We find that while dystroglycan is required to establish the proper architecture of the  
448 retina, it appears that only amacrine cells and RGCs are affected. What is the driving  
449 force behind the selective localization of amacrine cells and RGCs to the ectopic  
450 clusters that protrude into the vitreous? Previous work has shown that elimination of  
451 RGCs does not dramatically affect the lamination of other retinal neurons or the overall  
452 architecture of the retina (Kay et al., 2004; Wang et al., 2001). However, if RGCs are  
453 selectively mis-localized, other retinal neurons will organize themselves around the  
454 displaced RGCs, resulting in an overall disorganization of retinal lamination (Icha et al.,  
455 2016). In *dystroglycan* mutants, RGCs are the first neurons to encounter the  
456 degenerating ILM and inappropriately migrate into the vitreous. Mis-localized RGCs  
457 may then act actively recruit later born neurons such as amacrine cells to inappropriate  
458 locations. Consistent with previous results observed in  $\beta$ -1 Integrin mutants, synaptic  
459 markers were present in ectopic clusters, suggesting that neurons retain the ability to  
460 recruit synaptic partners despite their inappropriate location (Riccomagno et al., 2014).

461 Many neurons migrate radially to their appropriate lamina, then undergo tangential  
462 migration to establish non-random mosaic patterns (Galli-Resta et al., 1997; Reese et  
463 al., 1999). This tangential migration involves interactions between immature neurites of  
464 neighboring cells (Galli-Resta et al., 2002; Huckfeldt et al., 2009) and short-range  
465 interactions mediated by DSCAM and MEGF10/11 (Fuerst et al., 2008; Kay et al.,  
466 2012). A key feature of this process is that it occurs between homotypic cells within the  
467 same lamina, and cells in which mosaic spacing is disrupted are no longer restricted to  
468 a two-dimensional plane. In *dystroglycan* mutants, the mosaic spacing of horizontal  
469 cells and INL starburst amacrine cells is normal, but is dramatically disrupted in  
470 starburst amacrine cells in the GCL. This defect is not due to dystroglycan functioning  
471 within starburst amacrine cells, as mosaic spacing was normal in *DG; Isl1<sup>Cre</sup>* mutant  
472 retinas (data not shown). Rather, the selective defects in mosaic spacing of GCL  
473 starburst amacrine cells suggests that this may be a consequence of disrupting the two-  
474 dimensional organization of the GCL. Alternatively, mosaic spacing of cells within the  
475 GCL may require cues present in the ILM to guide tangential dispersion.

476

#### 477 **Intraretinal axon growth and guidance requires an intact ILM**

478 Previous work has shown that the ILM and other basement membranes function as  
479 excellent growth substrates for extending axons (Halfter et al., 1987; Wright et al.,  
480 2012). Basement membranes are highly dynamic structures that not only contain pro-  
481 growth ECM molecules such as laminins and collagens, but also regulate the  
482 distribution of secreted axon guidance cues in the extracellular environment (Chai and  
483 Morris, 1999; Wright et al., 2012; Xiao et al., 2011). A number of secreted cues direct

484 intraretinal axon guidance of RGCs. Deletion of Netrin (Deiner et al., 1997) specifically  
485 affects exit of RGC axons through the optic nerve head, and deletion of Slits (Thompson  
486 et al., 2006) or Sfrps (Nieto-lopez et al., 2015) leads to the invasion of RGC axons into  
487 the outer retina. These specific phenotypes are distinct from those we observed in the  
488 absence of dystroglycan. The randomized growth and defasciculation of axons we  
489 observed in *ISPD<sup>L79\*</sup>* and *DG; Six3<sup>Cre</sup>* mutant retinas is more consistent with defects  
490 observed upon deletion of adhesion receptors such as L1 (Bastmeyer et al., 1995),  
491 NCAM (Brittis et al., 1995) or DM-GRASP (Ott et al., 1998). These results suggest that  
492 the role of dystroglycan in guiding axons along the ILM is primarily to regulate axonal  
493 adhesion. While there are extensive intraretinal axon guidance defects in the absence  
494 of dystroglycan, some axons still appear normally oriented and fasciculated, exit the  
495 optic nerve head and project to the optic chiasm (Figure 2, unpublished results). We  
496 hypothesize that these normally oriented axons emanate from early born RGCs that  
497 begin to extend their axons as early as e13, prior the degeneration of the ILM. In  
498 contrast, later born RGCs that initiate axon growth after ILM degeneration lack an  
499 appropriate growth substrate and fail to orient their axons to the optic nerve head.

500

## 501 **Loss of RGCs, photoreceptors and horizontal cells in the absence of** 502 **dystroglycan**

503 Previous studies of mouse models of dystroglycanopathy have consistently noted  
504 retinal thinning. However, based on these studies, it was unclear which retinal cell types  
505 were affected. Our comprehensive analysis of P14 *DG; Six3<sup>cre</sup>* mutant retinas found that  
506 bipolar layer thickness was normal and INL and GCL starburst amacrine cells were



507 present at normal numbers. In contrast, photoreceptor layer thickness was reduced by  
508 approximately 20%, horizontal cell number in the INL was reduced by 16%, and RGC  
509 number exhibited a dramatic 50% reduction (Figure 5).

510 Analysis of e16 and P0 retinas from *ISPD<sup>L79\*</sup>* and *DG; Six3<sup>cre</sup>* mutants indicated that  
511 the loss of RGCs was due to increased apoptosis of cells in the GCL that preceded and  
512 extended into the normal window of developmental apoptotic cell death. This increase  
513 in apoptotic cell death did not persist in adult (P56) *DG; Six3<sup>cre</sup>* mutants (data not  
514 shown), suggesting it was likely restricted to the developing retina. Why are RGCs  
515 selectively lost at such a high rate in *DG; Six3<sup>cre</sup>* mutants? One possibility is that the  
516 degeneration of the ILM selectively affects cells in the ganglion cell layer (ganglion cells  
517 and displaced amacrine cells). However, amacrine cell number remained unchanged in  
518 the GCL. Another possibility is that RGCs are selectively affected since they are the  
519 only cell type to project out of the retina. Indeed, we observed profound defects in the  
520 ability of RGC axons to navigate the optic chiasm in *ISPD<sup>L79\*</sup>* and *DG; Six3<sup>cre</sup>* mutants  
521 (unpublished observations). These results suggest that the failure to reach  
522 retinorecipient regions of the brain resulted in the death of RGCs. It was originally  
523 postulated that BDNF from retinorecipient regions of the brain signaling through the  
524 TrkB receptor on RGCs regulates the survival of RGCs during development. However,  
525 RGC survival is unaffected in TrkB and BDNF knockouts (Cellerino et al., 1997; Rohrer  
526 et al., 2001). Therefore, while our data is consistent with the need for target-derived  
527 factors to support the survival of RGCs during development, the identity of these  
528 molecules remains elusive.

529 We also observed a reduction in thickness of the photoreceptor layer and in the  
530 number of horizontal cells in *DG; Six3<sup>cre</sup>* mutants. While we did not observe increased  
531 caspase-3 reactivity in these cells at P0, it is possible that the loss of cells occurred  
532 gradually during the first two postnatal weeks. Dystroglycan is required for the proper  
533 formation of ribbon synapses between photoreceptors, horizontal cells and bipolar cells  
534 in the OPL (Omori et al., 2012; Sato et al., 2008). Therefore, the loss of appropriate  
535 synaptic contact in the absence of dystroglycan may lead to the elimination of a  
536 proportion of photoreceptors and horizontal cells.

537

### 538 **Persistence of retinal waves in the absence of dystroglycan**

539 The profound defects in lamination and dendritic stratification of ChAT positive  
540 starburst amacrine cells in *DG; Six3<sup>cre</sup>* mutants led us to hypothesize that this would  
541 affect their ability to generate retinal waves. These waves are initiated by the  
542 spontaneous activity of starburst amacrine cells, independent of light stimuli, allowing us  
543 to circumvent the requirement for dystroglycan in proper transmission at ribbon  
544 synapses. Contrary to our expectations, retinal waves were present and propagated  
545 normally in *DG; Six3<sup>cre</sup>* mutants (Figure 8). The persistence of retinal waves even in the  
546 context of disrupted starburst amacrine cell organization supports the model that these  
547 waves are the product of volume release of ACh from starburst amacrine cells that can  
548 trigger extra-synaptic responses (Ford et al., 2012). Using a cell-based sensor, Ford  
549 and colleagues detected ACh release several micrometers above the surface of the  
550 retina, suggesting that ACh diffusion is sufficient to trigger a response in cells that are  
551 not physically connected. Therefore, the relatively normal organization of INL starburst

552 amacrine cells may be sufficient to overcome the disorganization of GCL starburst  
553 amacrine cells. We did observe a slight reduction in the rate of wave propagation, which  
554 may be due to the reduced density of cells with calcium transients within a retinal wave  
555 that were observed in *DG; Six3<sup>cre</sup>* mutants. This reduced density likely reflects the  
556 nearly 50% reduction in ganglion cell number, and suggests that while a full  
557 complement of RGCs is not required for the propagation of retina waves, it may affect  
558 their rate of propagation. While our results demonstrate that synaptic markers are  
559 present in the inner retina and spontaneous retinal activity persists in *DG; Six3<sup>cre</sup>*  
560 mutants, it remains unknown whether synaptic transmission between specific cell types  
561 within the inner retina is affected by the absence of dystroglycan.

562 Taken together, our data demonstrate that dystroglycan is required for multiple  
563 aspects of retinal development. Similar to its role in the cortex, dystroglycan in the  
564 retina functions within neuroepithelial cells to regulate the structural integrity of a  
565 basement membrane (the ILM), which is required for the coordination of neuronal  
566 migration, axon guidance and dendritic stratification in the inner retina. Overall, our data  
567 suggest that the disorganization of the inner retina and the loss of photoreceptors,  
568 horizontal cells and RGCs are key contributors to visual impairment in  
569 dystroglycanopathy.

570

## 571 **Experimental Procedures**

572

### 573 **Animals**

574 Animal procedures were approved by OHSU Institutional Animal Care and Use  
575 Committee and conformed to the National Institutes of Health *Guide for the care and*

576 *use of laboratory animals*. Animals were euthanized by administration of CO<sub>2</sub>. The day  
577 of vaginal plug observation was designated as embryonic day 0 (e0) and the day of birth  
578 in this study was designated as postnatal day 0 (P0). The generation and genotyping  
579 protocols for *ISPD<sup>L79\*/L79\*</sup>* (Wright et al., 2012), *DG<sup>F/F</sup>* (Moore et al., 2002) and *DG<sup>βcyt</sup>*  
580 (Satz et al., 2009) mice have been described previously. The presence of the cre allele  
581 in *Six3<sup>Cre</sup>* (Furuta et al., 2000), *Isl1<sup>Cre</sup>* (Yang et al., 2006) and *Nestin<sup>Cre</sup>* mice (Tronche et  
582 al., 1999) was detected by generic cre primers. *ISPD<sup>+/L79\*</sup>*, *DG<sup>ββ/+</sup>*, and *DG<sup>F/+</sup>*; *Six3<sup>Cre</sup>* or  
583 *DG<sup>F/+</sup>* age matched littermates were used as controls.

#### 584 **Tissue Preparation and Immunohistochemistry**

585 Embryonic retinas were left in the head and fixed overnight at 4°C in 4% PFA and  
586 washed in PBS for 30 minutes. Heads were equilibrated in 15% sucrose overnight and  
587 flash frozen in OCT medium. Postnatal retinas were dissected out of the animal and the  
588 lens was removed from the eyecup. Intact retinas were fixed at room temperature for 30  
589 minutes in 4% PFA. Retinas were washed in PBS for 30 minutes and equilibrated in a  
590 sequential gradient of 10%, sucrose, 20% sucrose and 30% sucrose overnight. Tissue  
591 was sectioned on a cryostat at 16-25um. Tissue sections were blocked in a PBS  
592 solution containing 2% Normal Donkey Serum and 0.2% Triton for 30 minutes, and  
593 incubated in primary antibody overnight at 4°C. Sections were washed for 30 minutes  
594 and incubated in secondary antibody in a PBS solution containing 2% Normal Donkey  
595 Serum for 2-4 hours. Sections were incubated in DAPI to stain nuclei for 10 minutes,  
596 washed for 30 minutes, and mounted using Fluoromount medium. All  
597 immunohistochemistry images have n≥3 from at least two different litters of mice. The

598 source and concentration of all antibodies utilized in this study are listed in  
599 Supplemental Table 1.

### 600 **Wholemout retinal staining**

601 Postnatal retinas were dissected out of the animal and the lens was removed from the  
602 eyecup. Intact retinas were fixed at room temperature for 30 minutes in 4% PFA.  
603 Retinas were incubated in primary antibody diluted in PBS solution containing 2%  
604 Normal Donkey Serum and 0.2% Triton for two days at 4°C. Retinas were washed in  
605 PBS for one day and incubated in secondary antibody diluted in PBS solution containing  
606 2% Normal Donkey Serum for two days at 4°C, washed for one day in PBS and  
607 mounted using Fluoromount medium.

### 608 **Microscopy**

609 Imaging was performed on a Zeiss Axio Imager M2 upright microscope equipped with  
610 an ApoTome.2. Imaging of synapses was performed on a Zeiss Elyra PS.1 with LSM  
611 710 laser-scanning confocal Super-Resolution Microscope with AiryScan. Imaging of  
612 retinal waves was performed on a Nikon TiE inverted microscope with full environmental  
613 chamber equipped with a Yokogawa CSU-W1 spinning disk confocal unit.

### 614 **Quantification of cell number and mosaic spacing**

615 For each experiment, 3-4 locations per retina at the midpoint of each lobe were  
616 sampled. Cell counts of horizontal cells (Calbindin), apoptotic cells (Cleaved Caspase-3,  
617 P0), and starburst amacrine cells (ChAT) were obtained from 500 x 500  $\mu\text{m}$  images and  
618 quantified in FIJI. Cell counts of apoptotic cells (Cleaved Caspase-3, e16) and ganglion  
619 cells (RPBMS) were obtained from 250 x 250  $\mu\text{m}$  images and quantified in FIJI.  
620 Analysis of retinal mosaics (Calbindin, ChAT) were conducted on 500 x 500  $\mu\text{m}$  images

621 by measuring the X-Y coordinates for each cell and Veronoi domains were calculated in  
622 Fiji and nearest neighbor measurements calculated with WinDRP.

### 623 **Live cell imaging and analysis**

624 Retinas from P1 *DG<sup>F/+</sup>; Six3<sup>cre</sup>; R26-LSL-GCaMP6f* and *DG<sup>F/-</sup>; Six3<sup>cre</sup>; R26-LSL-*  
625 *GCaMP6f* were dissected into chilled Ames' Medium (Sigma) buffered with sodium  
626 bicarbonate and bubbled with carbogen gas (95% O<sub>2</sub>, 5% CO<sub>2</sub>). The retinas were  
627 dissected out of the eyecup, mounted RGC side up on cellulose membrane filters  
628 (Millipore) and placed in a glass-bottom petri dish containing Ames' Medium. A platinum  
629 harp was used to stabilize the filter paper during imaging. Imaging was performed at  
630 30°C using a 10x0.45 Plan Apo Air objective with a field of 1664 by 1404 μm with a 3Hz  
631 imaging timeframe. The field was illuminated with a 488 nm laser. 3-4 retinal fields were  
632 imaged per retina, and each field of retina was imaged for a two-minute time series  
633 using a 300ms exposure and each field was sampled 3-5 times per imaging session.

634 Thirty representative control and thirty representative mutant time series were randomly  
635 selected for analysis. Only waves that initiated and terminated within the imaging field  
636 were used for analysis. To measure wave area, movies were manually viewed using  
637 FIJI frame by frame to determine the start and end frame of a wave. A Z-Projection for  
638 maximum intensity was used to create an image with the entire wave, and the boundary  
639 of the wave was manually traced to determine the area. Wave area per time was  
640 calculated by dividing the area of the wave by the duration in seconds of the wave. Any  
641 wave lasting less than 2 seconds was not used in analysis, consistent with previous  
642 studies (Blankenship et al., 2009).

### 643 **Statistics**

644 Statistical analysis was performed using JMP Pro 13.0 software (SAS Institute).  
645 Comparison between two groups was analyzed using a Student's t-test. Comparison  
646 between two or more groups was analyzed using a Two-Way ANOVA and Tukey post-  
647 hoc test. Comparison of retinal wave parameters was analyzed using a Wilcoxon Rank  
648 Sums test. The significance threshold was set at 0.05 for all statistical tests. \* indicates  
649  $p < 0.05$ ; \*\* indicates  $p < 0.01$ ; \*\*\* indicates  $p < 0.001$ .

650

### 651 **Acknowledgements**

652 We thank Patrick Kerstein and Kylee Rosette for their technical assistance; Marla Feller  
653 and Franklin Caval-Holme for advice on visualizing and analyzing retinal waves; W.  
654 Rowland Taylor and Teresa Puthussery and members of their labs for antibodies and  
655 technical advice; David Pow for the GlyT1 antibody; Catherine Morgans for the mGluR6  
656 antibody, Stefanie Kaech Petrie and the OHSU Advanced Light Microscopy Core (ALM)  
657 for assistance with confocal imaging; Alex Kolodkin, Martin Riccomagno, Randall Hand  
658 and members of the Campbell and Wright laboratories for discussion throughout the  
659 course of this study and comments on the manuscript. This work was supported by NIH  
660 Grants R01-NS091027 (K.M.W.), The Medical Research Foundation of Oregon  
661 (K.M.W.), NSF GRFP (R.C.), LaCroute Neurobiology of Disease Fellowship (R.C.),  
662 Tartar Trust Fellowship (R.C.), NINDS P30-NS061800 (OHSU ALM), and a Paul D.  
663 Wellstone Muscular Dystrophy Cooperative Research Center grant to K.P.C.  
664 (1U54NS053672). K.P.C. is an investigator of the Howard Hughes Medical Institute

## **References**

Arroyo, D.A., and Feller, M.B. (2016). Spatiotemporal Features of Retinal Waves Instruct the Wiring of the Visual Circuitry. *Front Neural Circuits* 10, 54. PMC4960261. 10.3389/fncir.2016.00054

Bao, Z.Z. (2008). Intraretinal projection of retinal ganglion cell axons as a model system for studying axon navigation. *Brain Research* 1192, 165-177. 10.1016/j.brainres.2007.01.116

Bassett, E.A., and Wallace, V.A. (2012). Cell fate determination in the vertebrate retina. *Trends in neurosciences* 35, 565-573. 10.1016/j.tins.2012.05.004

Bastmeyer, M., Ott, H., Leppert, C.A., and Stuermer, C.A. (1995). Fish E587 glycoprotein, a member of the L1 family of cell adhesion molecules, participates in axonal fasciculation and the age-related order of ganglion cell axons in the goldfish retina. *J Cell Biol* 130, 969-976. PMC2199948

Blank, M., Koulen, P., Blake, D.J., and Kroger, S. (1999). Dystrophin and beta-dystroglycan in photoreceptor terminals from normal and mdx3Cv mouse retinae. *Eur J Neurosci* 11, 2121-2133

Blankenship, A.G., Ford, K.J., Johnson, J., Seal, R.P., Edwards, R.H., Copenhagen, D.R., and Feller, M.B. (2009). Synaptic and extrasynaptic factors governing glutamatergic retinal waves. *Neuron* 62, 230-241. PMC2807181. 10.1016/j.neuron.2009.03.015

Booler, H.S., Williams, J.L., Hopkinson, M., and Brown, S.C. (2016). Degree of Cajal-Retzius Cell Mislocalization Correlates with the Severity of Structural Brain Defects in Mouse Models of Dystroglycanopathy. *Brain Pathology* 26, 465-478. 10.1111/bpa.12306

Braunger, B.M., Demmer, C., and Tamm, E.R. (2014). Programmed cell death during retinal development of the mouse eye. *Adv Exp Med Biol* 801, 9-13. 10.1007/978-1-4614-3209-8\_2

Brittis, P.A., Lemmon, V., Rutishauser, U., and Silver, J. (1995). Unique changes of ganglion cell growth cone behavior following cell adhesion molecule perturbations: a time-lapse study of the living retina. *Mol Cell Neurosci* 6, 433-449. 10.1006/mcne.1995.1032

Cellerino, A., Carroll, P., Thoenen, H., and Barde, Y.A. (1997). Reduced size of retinal ganglion cell axons and hypomyelination in mice lacking brain-derived neurotrophic factor. *Mol Cell Neurosci* 9, 397-408. 10.1006/mcne.1997.0641

Chai, L., and Morris, J.E. (1999). Heparan sulfate in the inner limiting membrane of embryonic chicken retina binds basic fibroblast growth factor to promote axonal outgrowth. *Exp Neurol* 160, 175-185. 10.1006/exnr.1999.7195



Chan, Y.M., Keramaris-Vrantsis, E., Lidov, H.G., Norton, J.H., Zinchenko, N., Gruber, H.E., Thresher, R., Blake, D.J., Ashar, J., Rosenfeld, J., *et al.* (2010). Fukutin-related protein is essential for mouse muscle, brain and eye development and mutation recapitulates the wide clinical spectrums of dystroglycanopathies. *Hum Mol Genet* *19*, 3995-4006. 10.1093/hmg/ddq314

Deiner, M.S., Kennedy, T.E., Fazeli, A., Serafini, T., Tessier-Lavigne, M., and Sretavan, D.W. (1997). Netrin-1 and DCC mediate axon guidance locally at the optic disc: loss of function leads to optic nerve hypoplasia. *Neuron* *19*, 575-589

Dobyns, W.B., Pagon, R.A., Armstrong, D., Curry, C.J., Greenberg, F., Grix, A., Holmes, L.B., Laxova, R., Michels, V.V., Robinow, M., *et al.* (1989). Diagnostic criteria for Walker-Warburg syndrome. *Am J Med Genet* *32*, 195-210. 10.1002/ajmg.1320320213

Edwards, M.M., Mammadova-Bach, E., Alpy, F., Klein, A., Hicks, W.L., Roux, M., Simon-Assmann, P., Smith, R.S., Orend, G., Wu, J., *et al.* (2010). Mutations in Lama1 disrupt retinal vascular development and inner limiting membrane formation. *J Biol Chem* *285*, 7697-7711. PMC2844215. 10.1074/jbc.M109.069575

Ford, K.J., Felix, A.L., and Feller, M.B. (2012). Cellular mechanisms underlying spatiotemporal features of cholinergic retinal waves. *The Journal of Neuroscience* *32*, 850-863. PMC3311224. 10.1523/JNEUROSCI.5309-12.2012

Fruh, S., Romanos, J., Panzanelli, P., Burgisser, D., Tyagarajan, S.K., Campbell, K.P., Santello, M., and Fritschy, J.M. (2016). Neuronal Dystroglycan Is Necessary for Formation and Maintenance of Functional CCK-Positive Basket Cell Terminals on Pyramidal Cells. *The Journal of Neuroscience* *36*, 10296-10313. 10.1523/jneurosci.1823-16.2016

Fruttiger, M. (2007). Development of the retinal vasculature. *Angiogenesis* *10*, 77-88. 10.1007/s10456-007-9065-1

Fuerst, P.G., Koizumi, A., Masland, R.H., and Burgess, R.W. (2008). Neurite arborization and mosaic spacing in the mouse retina require DSCAM. *Nature* *451*, 470-474. PMC2259282. 10.1038/nature06514

Furuta, Y., Lagutin, O., Hogan, B.L., and Oliver, G.C. (2000). Retina- and ventral forebrain-specific Cre recombinase activity in transgenic mice. *Genesis* *26*, 130-132

Galli-Resta, L., Novelli, E., and Viegi, A. (2002). Dynamic microtubule-dependent interactions position homotypic neurones in regular monolayered arrays during retinal development. *Development* *129*, 3803-3814

Galli-Resta, L., Resta, G., Tan, S.S., and Reese, B.E. (1997). Mosaics of islet-1-expressing amacrine cells assembled by short-range cellular interactions. *The Journal of Neuroscience* *17*, 7831-7838

Gnanaguru, G., Bachay, G., Biswas, S., Pinzon-Duarte, G., Hunter, D.D., and Brunken, W.J. (2013). Laminins containing the beta2 and gamma3 chains regulate astrocyte migration and angiogenesis in the retina. *Development* 140, 2050-2060. PMC3631977. 10.1242/dev.087817

Godfrey, C., Foley, A.R., Clement, E., and Muntoni, F. (2011). Dystroglycanopathies: coming into focus. *Current Opinion in Genetics & Development* 21, 278-285. 10.1016/j.gde.2011.02.001

Halfter, W., Reckhaus, W., and Kroger, S. (1987). Nondirected axonal growth on basal lamina from avian embryonic neural retina. *The Journal of Neuroscience* 7, 3712-3722

Halfter, W., Willem, M., and Mayer, U. (2005). Basement membrane-dependent survival of retinal ganglion cells. *Invest Ophthalmol Vis Sci* 46, 1000-1009. 10.1167/iovs.04-1185

Huckfeldt, R.M., Schubert, T., Morgan, J.L., Godinho, L., Di Cristo, G., Huang, Z.J., and Wong, R.O.L. (2009). Transient neurites of retinal horizontal cells exhibit columnar tiling via homotypic interactions. *Nature Neuroscience* 12, 35-43. 10.1038/nn.2236

Icha, J., Kunath, C., Rocha-Martins, M., and Norden, C. (2016). Independent modes of ganglion cell translocation ensure correct lamination of the zebrafish retina. *J Cell Biol* 215, 259-275. PMC5084647. 10.1083/jcb.201604095

Kay, J.N., Chu, M.W., and Sanes, J.R. (2012). MEGF10 and MEGF11 mediate homotypic interactions required for mosaic spacing of retinal neurons. *Nature* 483, 465-469. PMC3310952. 10.1038/nature10877

Kay, J.N., Roeser, T., Mumm, J.S., Godinho, L., Mrejeru, A., Wong, R.O.L., and Baier, H. (2004). Transient requirement for ganglion cells during assembly of retinal synaptic layers. *Development* 131, 1331-1342. 10.1242/dev.01040

Lee, Y., Kameya, S., Cox, G.A., Hsu, J., Hicks, W., Maddatu, T.P., Smith, R.S., Naggert, J.K., Peachey, N.S., and Nishina, P.M. (2005). Ocular abnormalities in Large(myd) and Large(vls) mice, spontaneous models for muscle, eye, and brain diseases. *Mol Cell Neurosci* 30, 160-172. 10.1016/j.mcn.2005.07.009

Li, S., Sukeena, J.M., Simmons, a.B., Hansen, E.J., Nuhn, R.E., Samuels, I.S., and Fuerst, P.G. (2015). DSCAM Promotes Refinement in the Mouse Retina through Cell Death and Restriction of Exploring Dendrites. *Journal of Neuroscience* 35, 5640-5654. 10.1523/JNEUROSCI.2202-14.2015

Livesey, F.J., and Cepko, C.L. (2001). Vertebrate neural cell-fate determination: lessons from the retina. *Nature Reviews Neuroscience* 2, 109-118. 10.1038/35053522

Marcos, S., Nieto-Lopez, F., Sandonis, A., Cardozo, M.J., Marco, F.D., Esteve, P., and Bovolenta, P. (2015). Secreted frizzled related proteins modulate pathfinding and fasciculation of

mouse retina ganglion cell axons by direct and indirect mechanisms. *The Journal Neuroscience* 35, 4729-4740. 10.1523/JNEUROSCI.3304-13.2015

Montanaro, F., Carbonetto, S., Campbell, K.P., and Lindenbaum, M. (1995). Dystroglycan expression in the wild type and mdx mouse neural retina: synaptic colocalization with dystrophin, dystrophin-related protein but not laminin. *Journal of Neuroscience Research* 42, 528-538. 10.1002/jnr.490420411

Moore, C.J., and Winder, S.J. (2010). Dystroglycan versatility in cell adhesion: a tale of multiple motifs. *Cell Communication and Signaling* 8, 3. 10.1186/1478-811X-8-3

Moore, C.J., and Winder, S.J. (2012). The inside and out of dystroglycan post-translational modification. *Neuromuscular Disorders* 22, 959-965. 10.1016/j.nmd.2012.05.016

Moore, S.A., Saito, F., Chen, J., Michele, D.E., Henry, M.D., Messing, A., Cohn, R.D., Ross-Barta, S.E., Westra, S., Williamson, R.A., *et al.* (2002). Deletion of brain dystroglycan recapitulates aspects of congenital muscular dystrophy. *Nature* 418, 422-425. 10.1038/nature00838

Morgan, J., and Wong, R. (1995). Development of Cell Types and Synaptic Connections in the Retina. In *Webvision: The Organization of the Retina and Visual System*, H. Kolb, E. Fernandez, and R. Nelson, eds. (Salt Lake City (UT)).

Myshra, T.D., Moore, S.A., Ostendorf, A.P., Satz, J.S., Kowalczyk, T., Nguyen, H., Daza, R.A., Lau, C., Campbell, K.P., and Hevner, R.F. (2012). Dystroglycan on radial glia end feet is required for pial basement membrane integrity and columnar organization of the developing cerebral cortex. *J Neuropathol Exp Neurol* 71, 1047-1063. PMC3512206. 10.1097/NEN.0b013e318274a128

Nakagawa, N., Yagi, H., Kato, K., Takematsu, H., and Oka, S. (2015). Ectopic clustering of Cajal-Retzius and subplate cells is an initial pathological feature in Pomgnt2-knockout mice, a model of dystroglycanopathy. *Scientific Reports* 5, 11163. PMC4461912. 10.1038/srep11163

Omori, Y., Araki, F., Chaya, T., Kajimura, N., Irie, S., Terada, K., Muranishi, Y., Tsujii, T., Ueno, S., Koyasu, T., *et al.* (2012). Presynaptic dystroglycan-pikachurin complex regulates the proper synaptic connection between retinal photoreceptor and bipolar cells. *The Journal Neuroscience* 32, 6126-6137. 10.1523/JNEUROSCI.0322-12.2012

Ott, H., Bastmeyer, M., and Stuermer, C.A. (1998). Neurolin, the goldfish homolog of DM-GRASP, is involved in retinal axon pathfinding to the optic disk. *The Journal of Neuroscience* 18, 3363-3372

Pan, L., Deng, M., Xie, X., and Gan, L. (2008). ISL1 and BRN3B co-regulate the differentiation of murine retinal ganglion cells. *Development* 135, 1981-1990. 10.1242/dev.010751

Petros, T.J., Rebsam, A., and Mason, C.A. (2008). Retinal axon growth at the optic chiasm: to cross or not to cross. *Annual Review of Neuroscience* 31, 295-315.  
10.1146/annurev.neuro.31.060407.125609

Pinzon-Duarte, G., Daly, G., Li, Y.N., Koch, M., and Brunken, W.J. (2010). Defective formation of the inner limiting membrane in laminin beta2- and gamma3-null mice produces retinal dysplasia. *Invest Ophthalmol Vis Sci* 51, 1773-1782. PMC2868416. 10.1167/iovs.09-4645

Randlett, O., Poggi, L., Zolessi, F.R., and Harris, W.A. (2011). The oriented emergence of axons from retinal ganglion cells is directed by laminin contact in vivo. *Neuron* 70, 266-280.  
10.1016/j.neuron.2011.03.013

Reese, B.E. (2011). Development of the retina and optic pathway. *Vision research* 51, 613-632. 10.1016/j.visres.2010.07.010

Reese, B.E., Necessary, B.D., Tam, P.P., Faulkner-Jones, B., and Tan, S.S. (1999). Clonal expansion and cell dispersion in the developing mouse retina. *Eur J Neurosci* 11, 2965-2978

Riccomagno, M.M., Sun, L.O., Brady, C.M., Alexandropoulos, K., Seo, S., Kurokawa, M., and Kolodkin, A.L. (2014). Cas adaptor proteins organize the retinal ganglion cell layer downstream of integrin signaling. *Neuron* 81, 779-786. 10.1016/j.neuron.2014.01.036

Rohrer, B., LaVail, M.M., Jones, K.R., and Reichardt, L.F. (2001). Neurotrophin receptor TrkB activation is not required for the postnatal survival of retinal ganglion cells in vivo. *Exp Neurol* 172, 81-91. 10.1006/exnr.2001.7795

Sato, S., Omori, Y., Katoh, K., Kondo, M., Kanagawa, M., Miyata, K., Funabiki, K., Koyasu, T., Kajimura, N., Miyoshi, T., *et al.* (2008). Pikachurin, a dystroglycan ligand, is essential for photoreceptor ribbon synapse formation. *Nature Neuroscience* 11, 923-931.  
10.1038/nn.2160

Satz, J.S., Barresi, R., Durbeej, M., Willer, T., Turner, A., Moore, S.A., and Campbell, K.P. (2008). Brain and eye malformations resembling Walker-Warburg syndrome are recapitulated in mice by dystroglycan deletion in the epiblast. *The Journal of Neuroscience* 28, 10567-10575. 10.1523/JNEUROSCI.2457-08.2008

Satz, J.S., Ostendorf, A.P., Hou, S., Turner, A., Kusano, H., Lee, J.C., Turk, R., Nguyen, H., Ross-Barta, S.E., Westra, S., *et al.* (2010). Distinct functions of glial and neuronal dystroglycan in the developing and adult mouse brain. *The Journal of Neuroscience* 30, 14560-14572.  
10.1523/JNEUROSCI.3247-10.2010

Satz, J.S., Philp, A.R., Nguyen, H., Kusano, H., Lee, J., Turk, R., Riker, M.J., Hernández, J., Weiss, R.M., Anderson, M.G., *et al.* (2009). Visual impairment in the absence of dystroglycan. *The Journal of Neuroscience* 29, 13136-13146. 10.1523/JNEUROSCI.0474-09.2009

Takahashi, H., Kanasaki, H., Igarashi, T., Kameya, S., Yamaki, K., Mizota, A., Kudo, A., Miyagoe-Suzuki, Y., Takeda, S., and Takahashi, H. (2011). Reactive gliosis of astrocytes and Muller glial cells in retina of POMGnT1-deficient mice. *Mol Cell Neurosci* 47, 119-130. 10.1016/j.mcn.2011.03.006

Takeda, S., Kondo, M., Sasaki, J., Kurahashi, H., Kano, H., Arai, K., Misaki, K., Fukui, T., Kobayashi, K., Tachikawa, M., *et al.* (2003). Fukutin is required for maintenance of muscle integrity, cortical histiogenesis and normal eye development. *Hum Mol Genet* 12, 1449-1459

Taniguchi-Ikeda, M., Morioka, I., Iijima, K., and Toda, T. (2016). Mechanistic aspects of the formation of alpha-dystroglycan and therapeutic research for the treatment of alpha-dystroglycanopathy: A review. *Mol Aspects Med* 51, 115-124. 10.1016/j.mam.2016.07.003

Tao, C., and Zhang, X. (2016). Retinal Proteoglycans Act as Cellular Receptors for Basement Membrane Assembly to Control Astrocyte Migration and Angiogenesis. *Cell Rep* 17, 1832-1844. PMC5129871. 10.1016/j.celrep.2016.10.035

Taylor, L., Arner, K., Engelsberg, K., and Ghosh, F. (2015). Scaffolding the retina: the interstitial extracellular matrix during rat retinal development. *Int J Dev Neurosci* 42, 46-58. 10.1016/j.ijdevneu.2015.03.002

Thompson, H., Camand, O., Barker, D., and Erskine, L. (2006). Slit proteins regulate distinct aspects of retinal ganglion cell axon guidance within dorsal and ventral retina. *The Journal of Neuroscience* 26, 8082-8091. 10.1523/JNEUROSCI.1342-06.2006

Tronche, F., Kellendonk, C., Kretz, O., Gass, P., Anlag, K., Orban, P.C., Bock, R., Klein, R., and Schutz, G. (1999). Disruption of the glucocorticoid receptor gene in the nervous system results in reduced anxiety. *Nat Genet* 23, 99-103. 10.1038/12703

Varshney, S., Hunter, D.D., and Brunken, W.J. (2015). Extracellular Matrix Components Regulate Cellular Polarity and Tissue Structure in the Developing and Mature Retina. *J Ophthalmic Vis Res* 10, 329-339. PMC4687269. 10.4103/2008-322X.170354

Wang, S.W., Kim, B.S., Ding, K., Wang, H., Sun, D., Johnson, R.L., Klein, W.H., and Gan, L. (2001). Requirement for math5 in the development of retinal ganglion cells. *Genes Dev* 15, 24-29. PMC312600

Wassle, H., and Riemann, H.J. (1978). The mosaic of nerve cells in the mammalian retina. *Proc R Soc Lond B Biol Sci* 200, 441-461

Wright, K.M., Lyon, K.A., Leung, H., Leahy, D.J., Ma, L., and Ginty, D.D. (2012). Dystroglycan organizes axon guidance cue localization and axonal pathfinding. *Neuron* 76, 931-944. 10.1016/j.neuron.2012.10.009

Xiao, T., Staub, W., Robles, E., Gosse, N.J., Cole, G.J., and Baier, H. (2011). Assembly of lamina-specific neuronal connections by slit bound to type IV collagen. *Cell* 146, 164-176. PMC3136219. 10.1016/j.cell.2011.06.016

Xu, H.P., Burbridge, T.J., Ye, M., Chen, M., Ge, X., Zhou, Z.J., and Crair, M.C. (2016). Retinal Wave Patterns Are Governed by Mutual Excitation among Starburst Amacrine Cells and Drive the Refinement and Maintenance of Visual Circuits. *The Journal of Neuroscience* 36, 3871-3886. PMC4812142. 10.1523/JNEUROSCI.3549-15.2016

Yang, L., Cai, C.L., Lin, L., Qyang, Y., Chung, C., Monteiro, R.M., Mummery, C.L., Fishman, G.I., Cogen, A., and Evans, S. (2006). *Isl1*Cre reveals a common Bmp pathway in heart and limb development. *Development* 133, 1575-1585. 10.1242/dev.02322

Young, R.W. (1984). Cell death during differentiation of the retina in the mouse. *J Comp Neurol* 229, 362-373. 10.1002/cne.902290307

Yurchenco, P.D. (2011). Basement membranes: cell scaffoldings and signaling platforms. *Cold Spring Harb Perspect Biol* 3. PMC3039528. 10.1101/cshperspect.a004911

# Figure 1

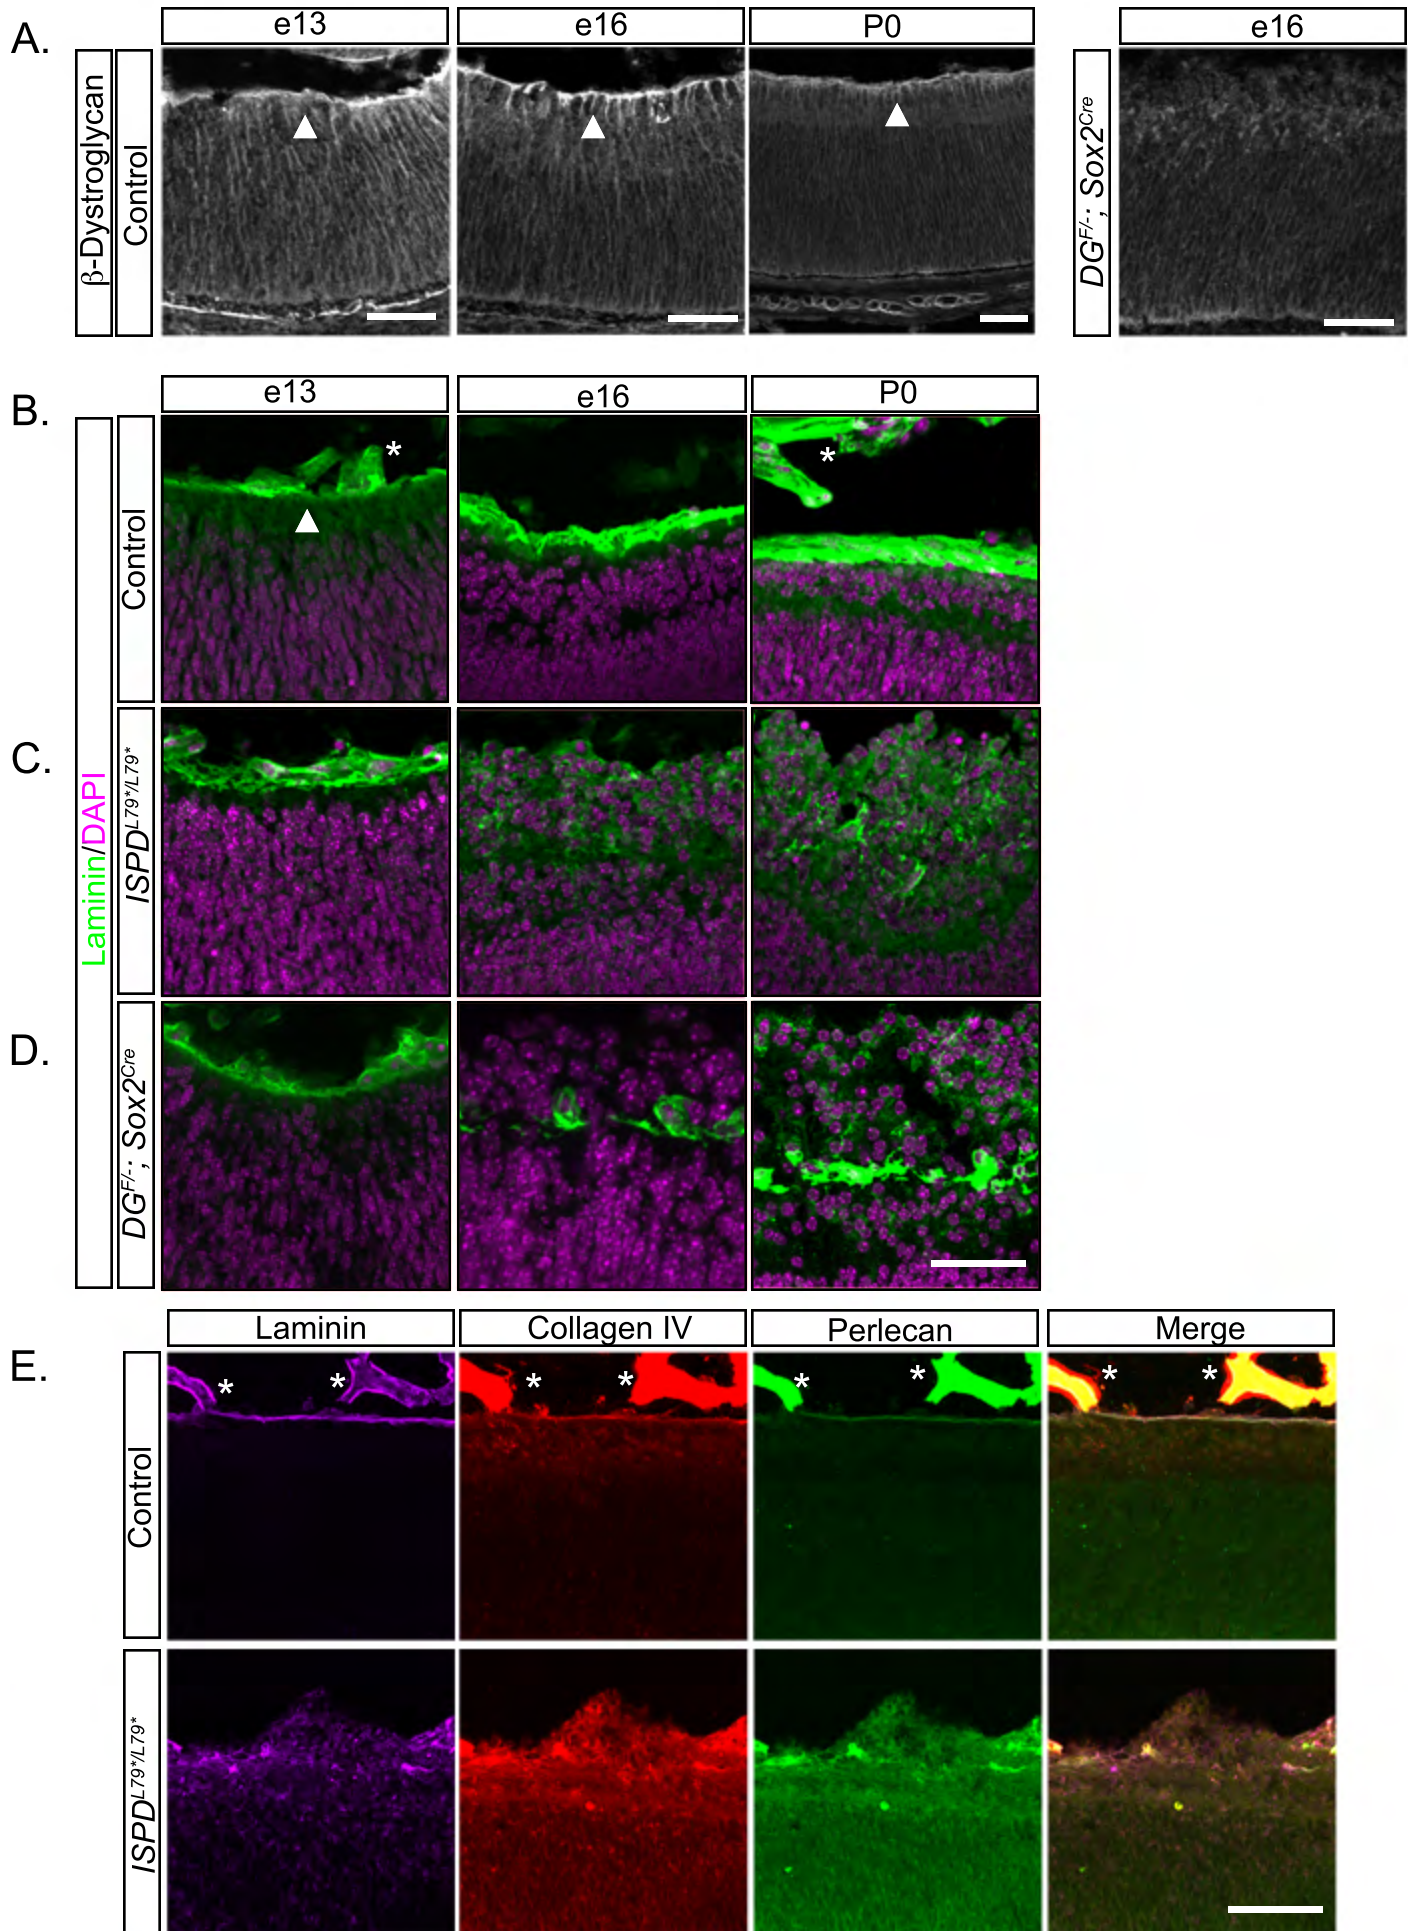

## Figure 2

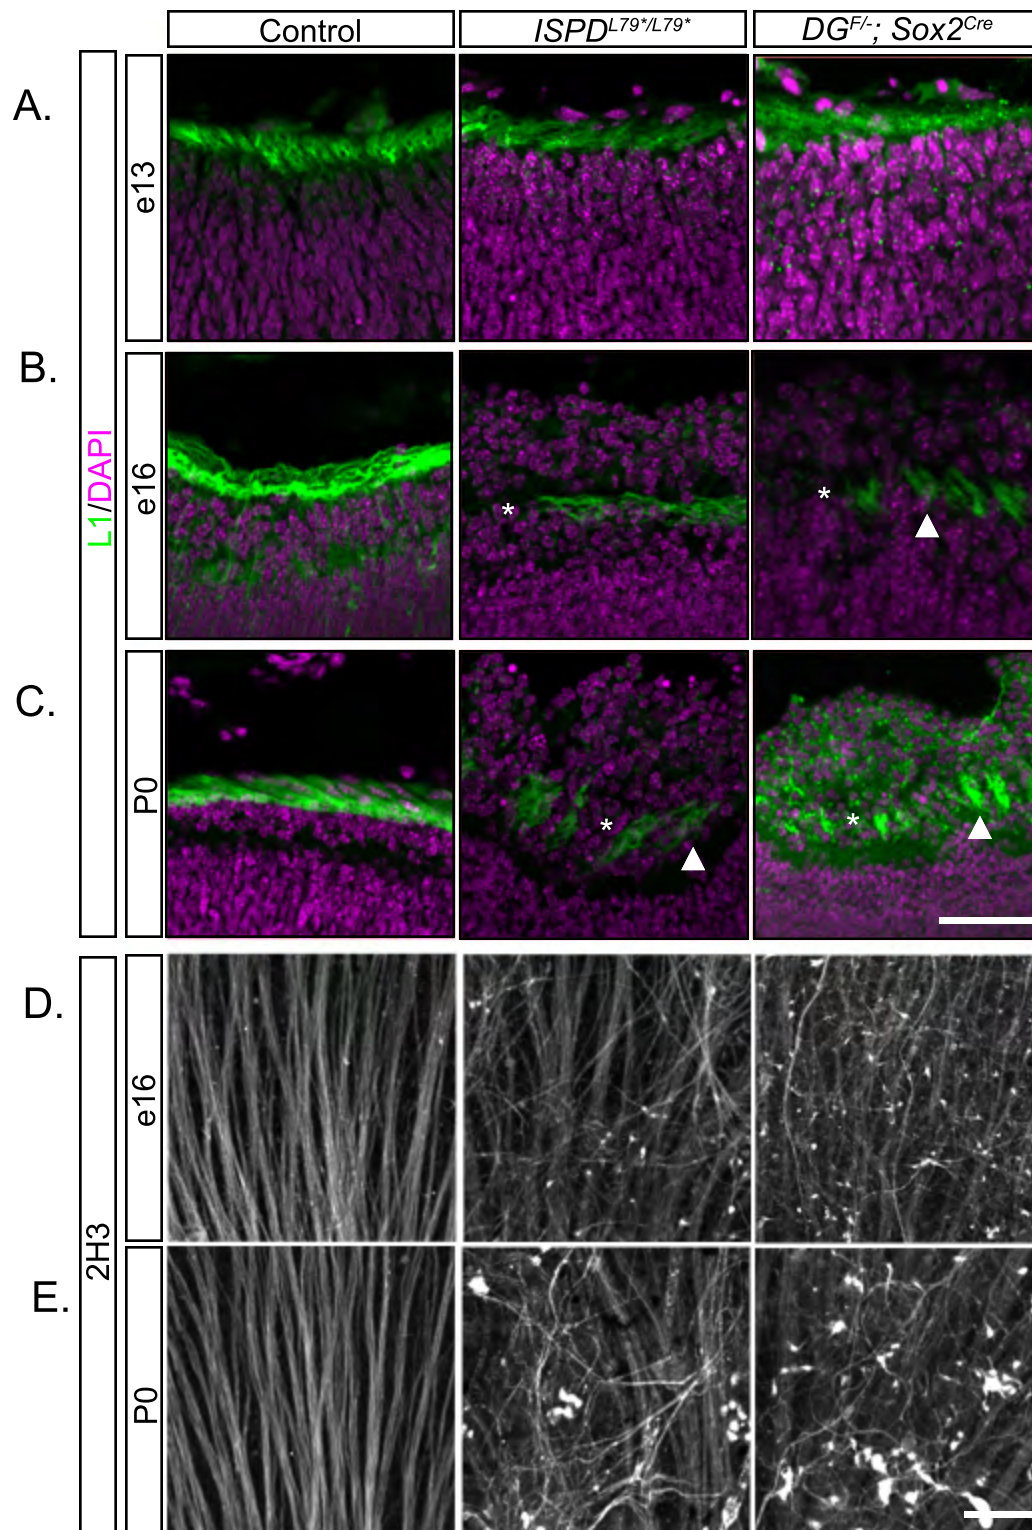



## Figure 3

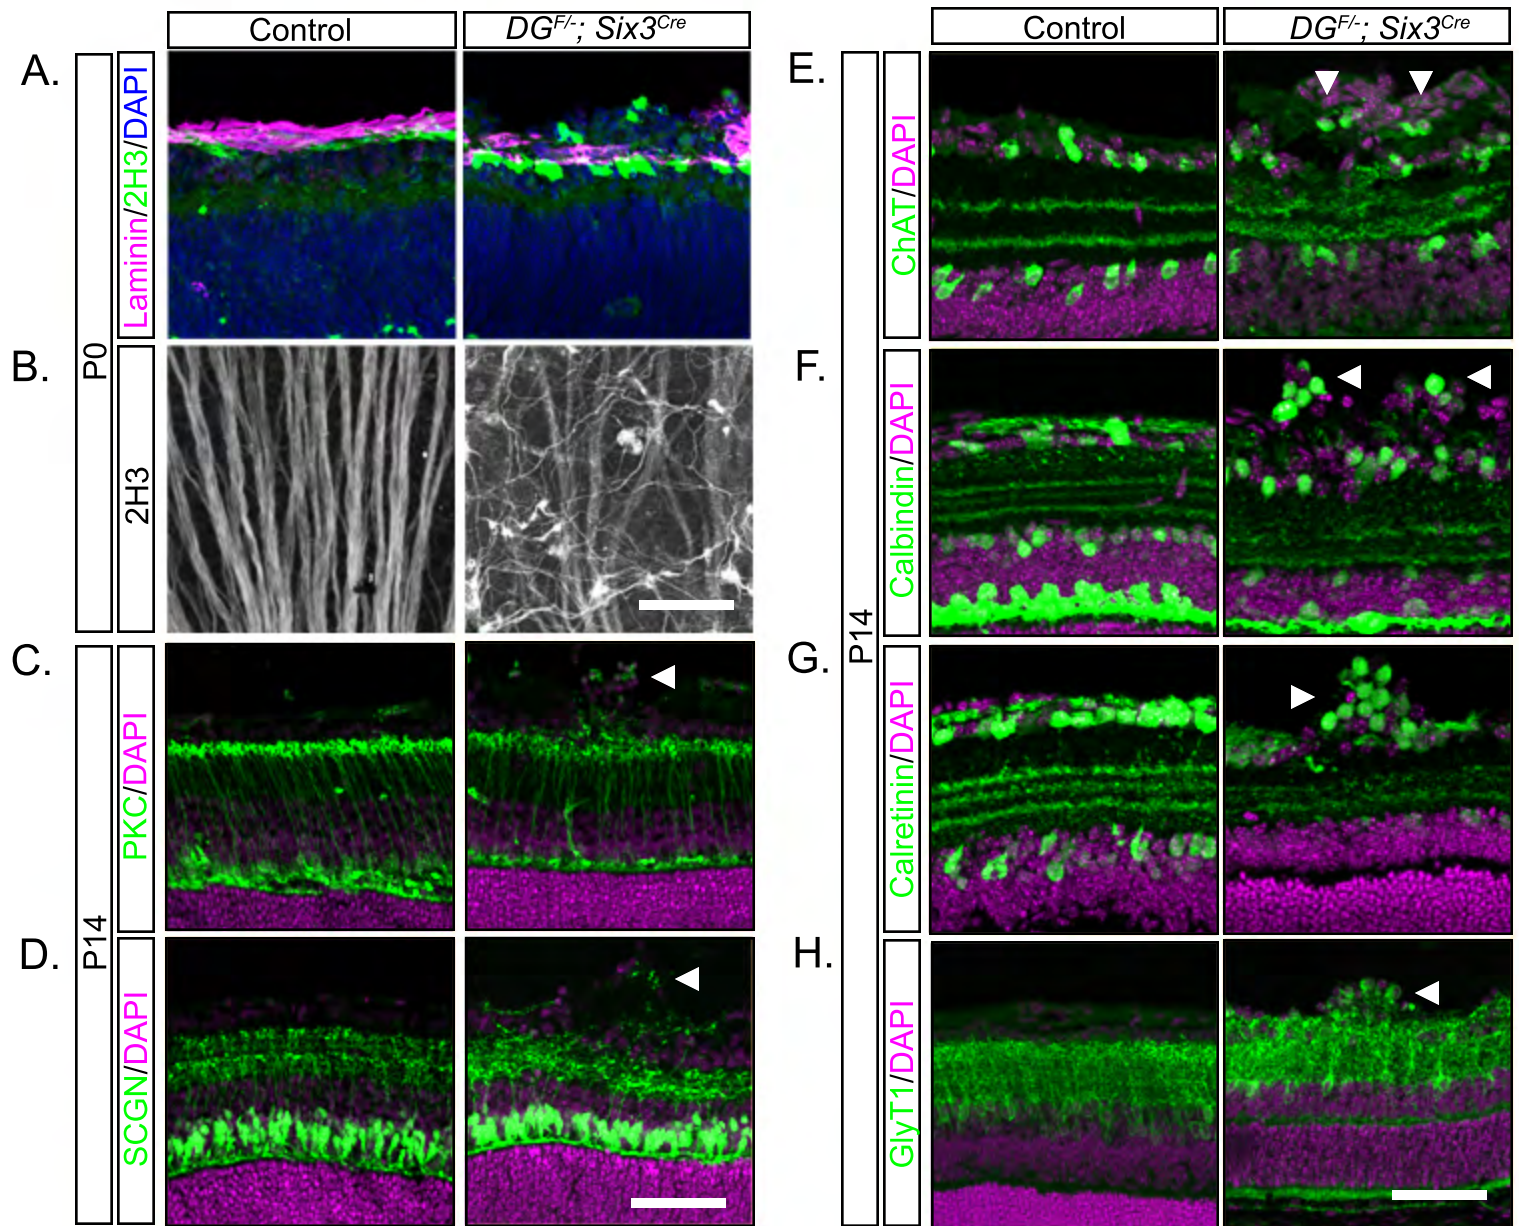

## Figure 4

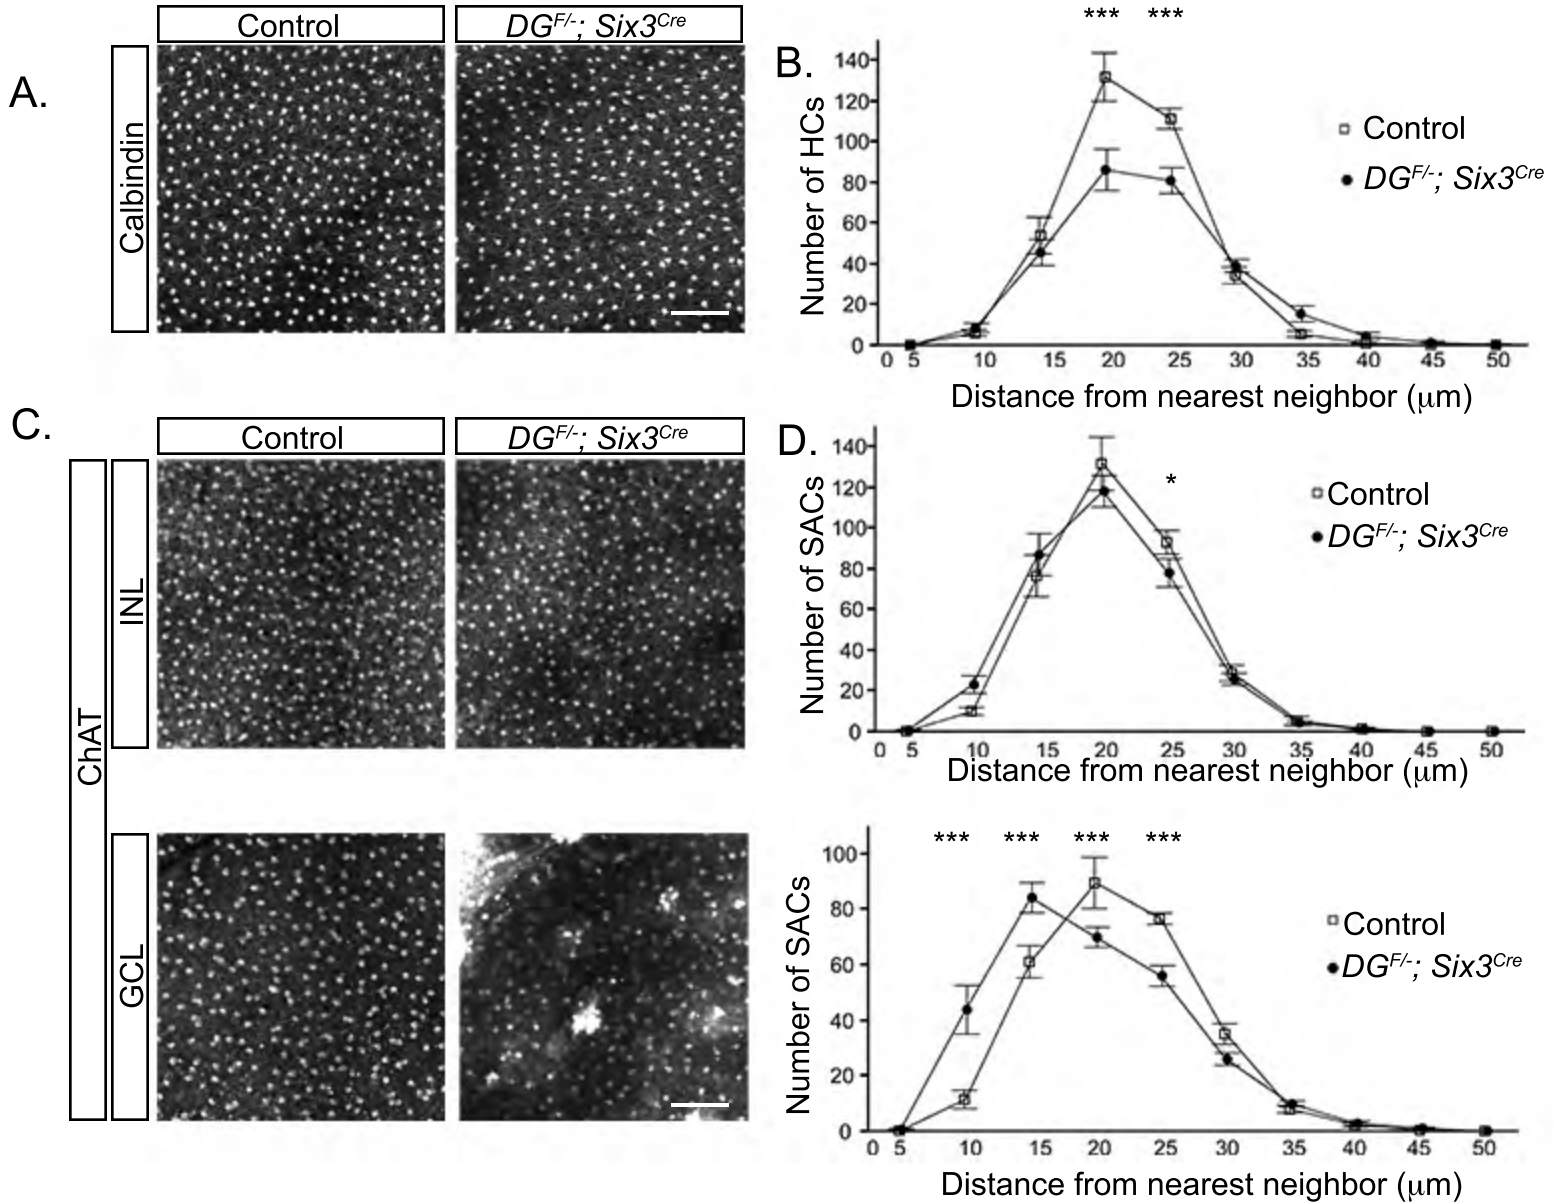

## Figure 5

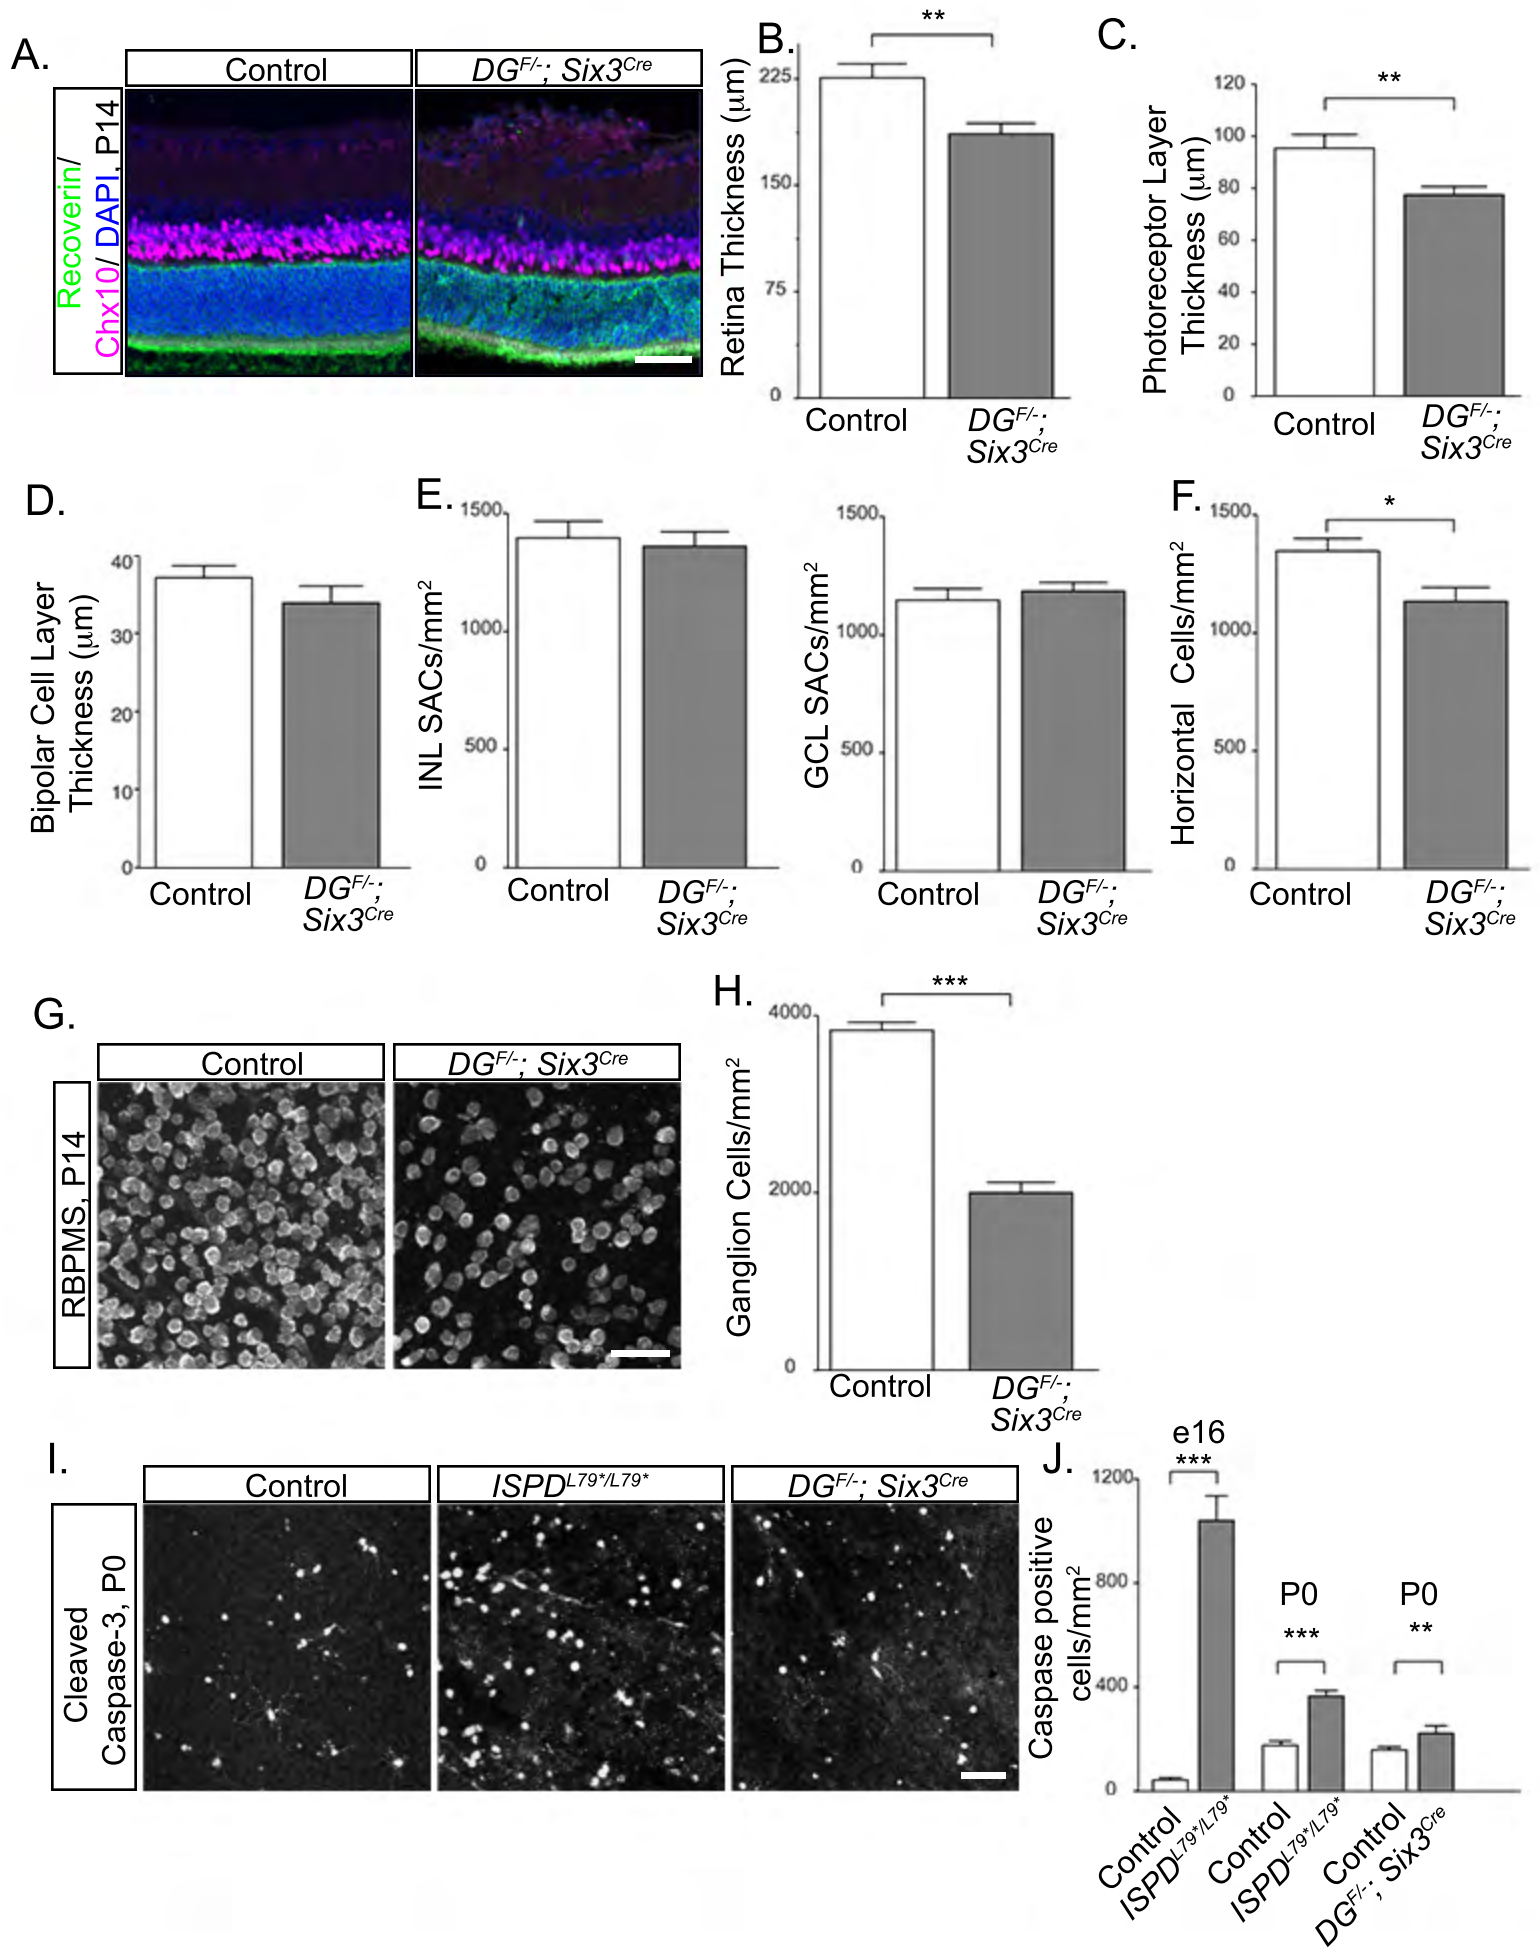

## Figure 6

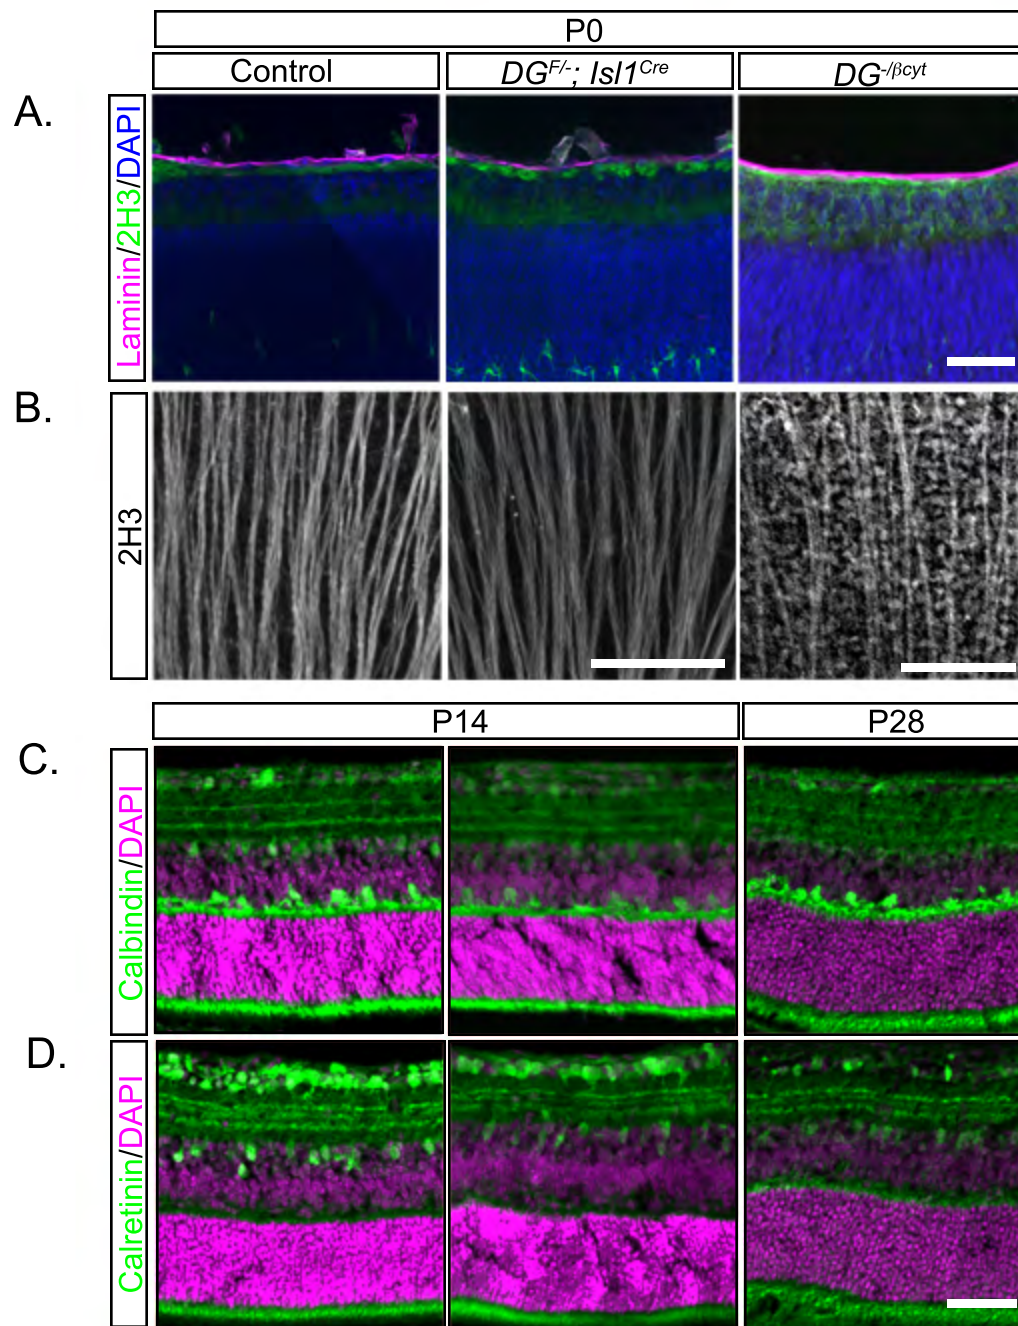

## Figure 7

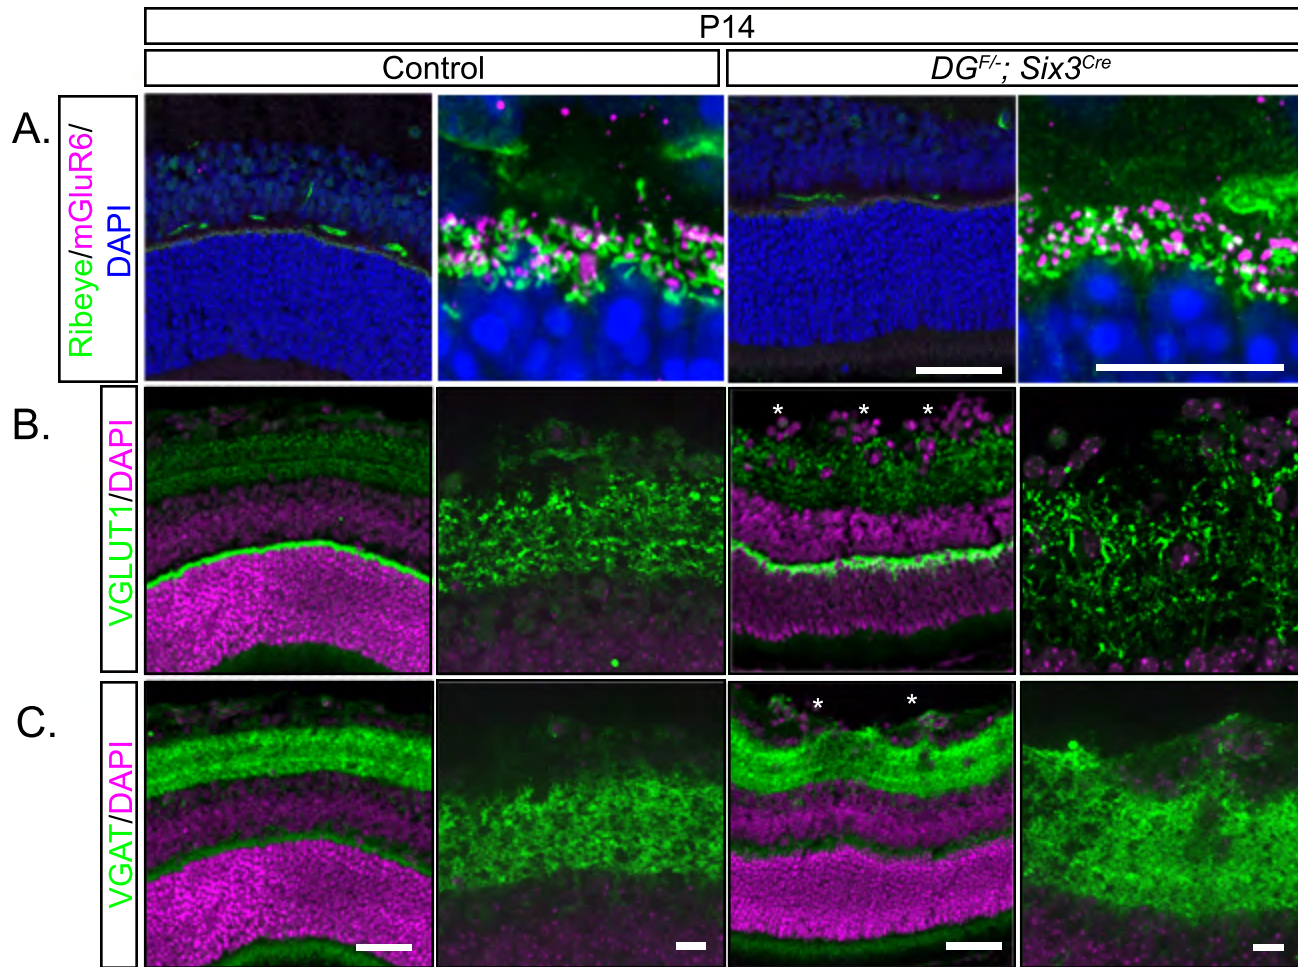

Figure 8

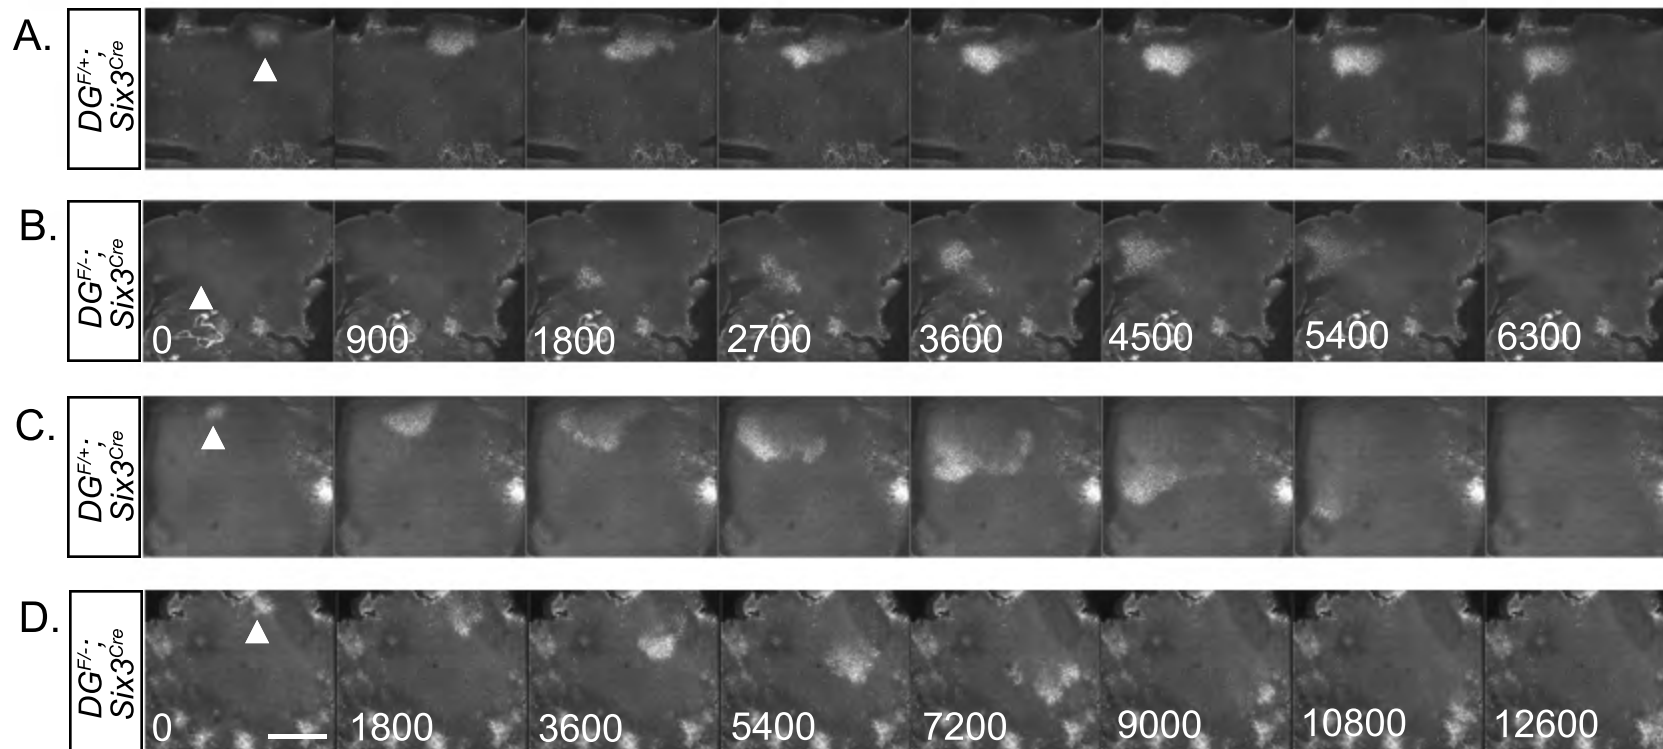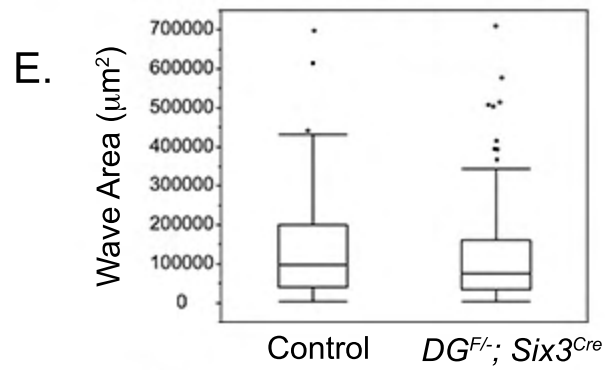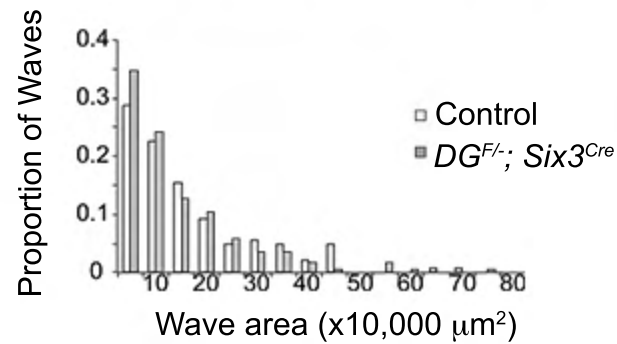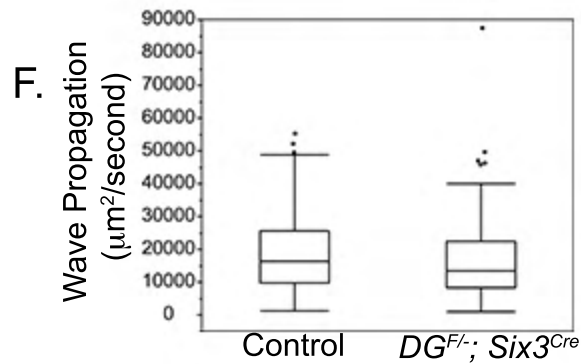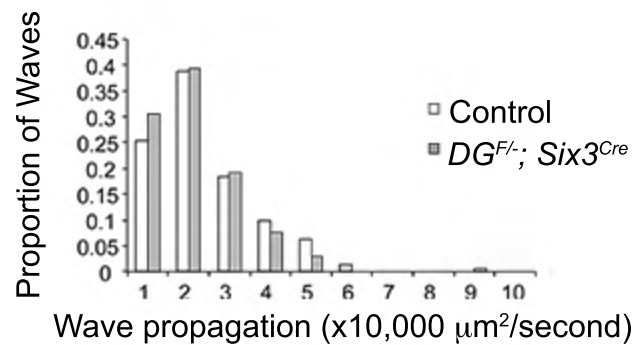

## Supplemental Table 1

| <b>Target</b>     | <b>Host species</b> | <b>Dilution</b> | <b>Company/origin</b>           | <b>Catalog #</b> | <b>RRID</b> |
|-------------------|---------------------|-----------------|---------------------------------|------------------|-------------|
| Beta DG           | rabbit              | 1:100           | Santa Cruz Biotech              | sc-28535         | AB_782259   |
| Laminin           | rabbit              | 1:1000          | Sigma                           | L9393            | AB_477163   |
| Collagen IV       | goat                | 1:250           | Southern Biotech                | 1340-01          | AB_2082646  |
| Perlecan          | rat                 | 1:500           | Millipore                       | MAB1948P         | AB_10615958 |
| L1                | rat                 | 1:500           | Millipore                       | MAB5272          | AB_2133200  |
| 2H3               | mouse               | 1:1000          | DSHB                            | 2h3              | AB_531793   |
| ChAT              | goat                | 1:500           | Millipore                       | AB144P-200UL     | AB_11214092 |
| Calbindin         | rabbit              | 1:10,000        | Swant                           | CB 38            | AB_10000340 |
| Calretinin        | rabbit              | 1:10,000        | Swant                           | CG 1             | AB_2619710  |
| GlyT1             | rabbit              | 1:800           | gift from Dr. David Pow         |                  |             |
| PKC               | mouse               | 1:500           | Sigma                           | P5704            | AB_477375   |
| Secretagogen      | rabbit              | 1:4000          | Biovendor                       | rd181120100      | AB_2034060  |
| Recoverin         | rabbit              | 1:200           | Millipore                       | AB5585           | AB_2253622  |
| Chx10             | goat                | 1:500           | Santa Cruz Biotech              | sc-21690         | AB_2216006  |
| RBPMS             | guinea pig          | 1:500           | PhosphoSolutions                | 1832-RBPMS       | AB_2492226  |
| Cleaved Caspase-3 | rabbit              | 1:500           | Cell Signaling                  | 9661S            | AB_2341188  |
| Ribeye/Ctbp2      | mouse               | 1:1000          | BD Biosciences                  | 612044           | AB_399431   |
| MGlur6            | sheep               | 1:100           | gift from Dr. Catherine Morgans |                  |             |
| VGLUT1            | guinea pig          | 1:500           | Millipore                       | AB5905           | AB_2301751  |
| VGAT              | rabbit              | 1:500           | Synaptic Systems                | 131-003          | AB_887869   |

## Supplemental Figure 1

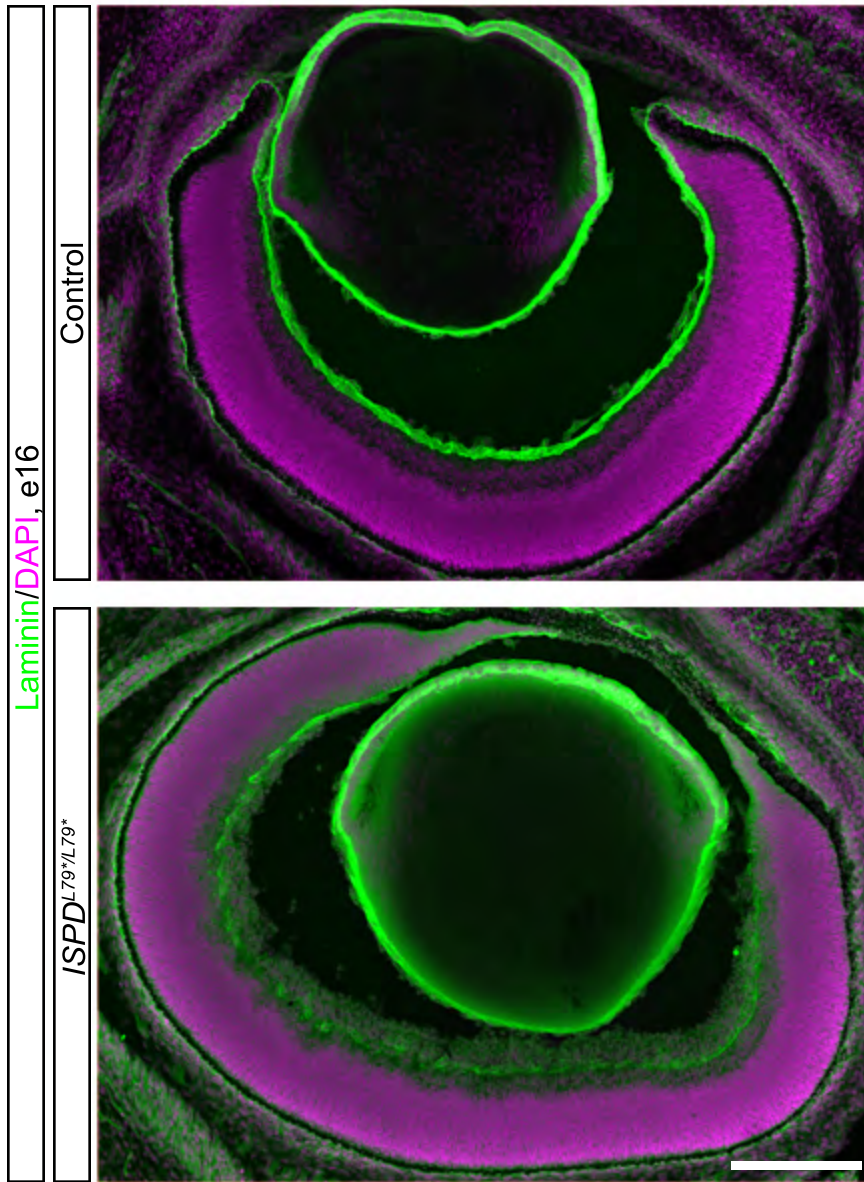



## Supplemental Figure 2

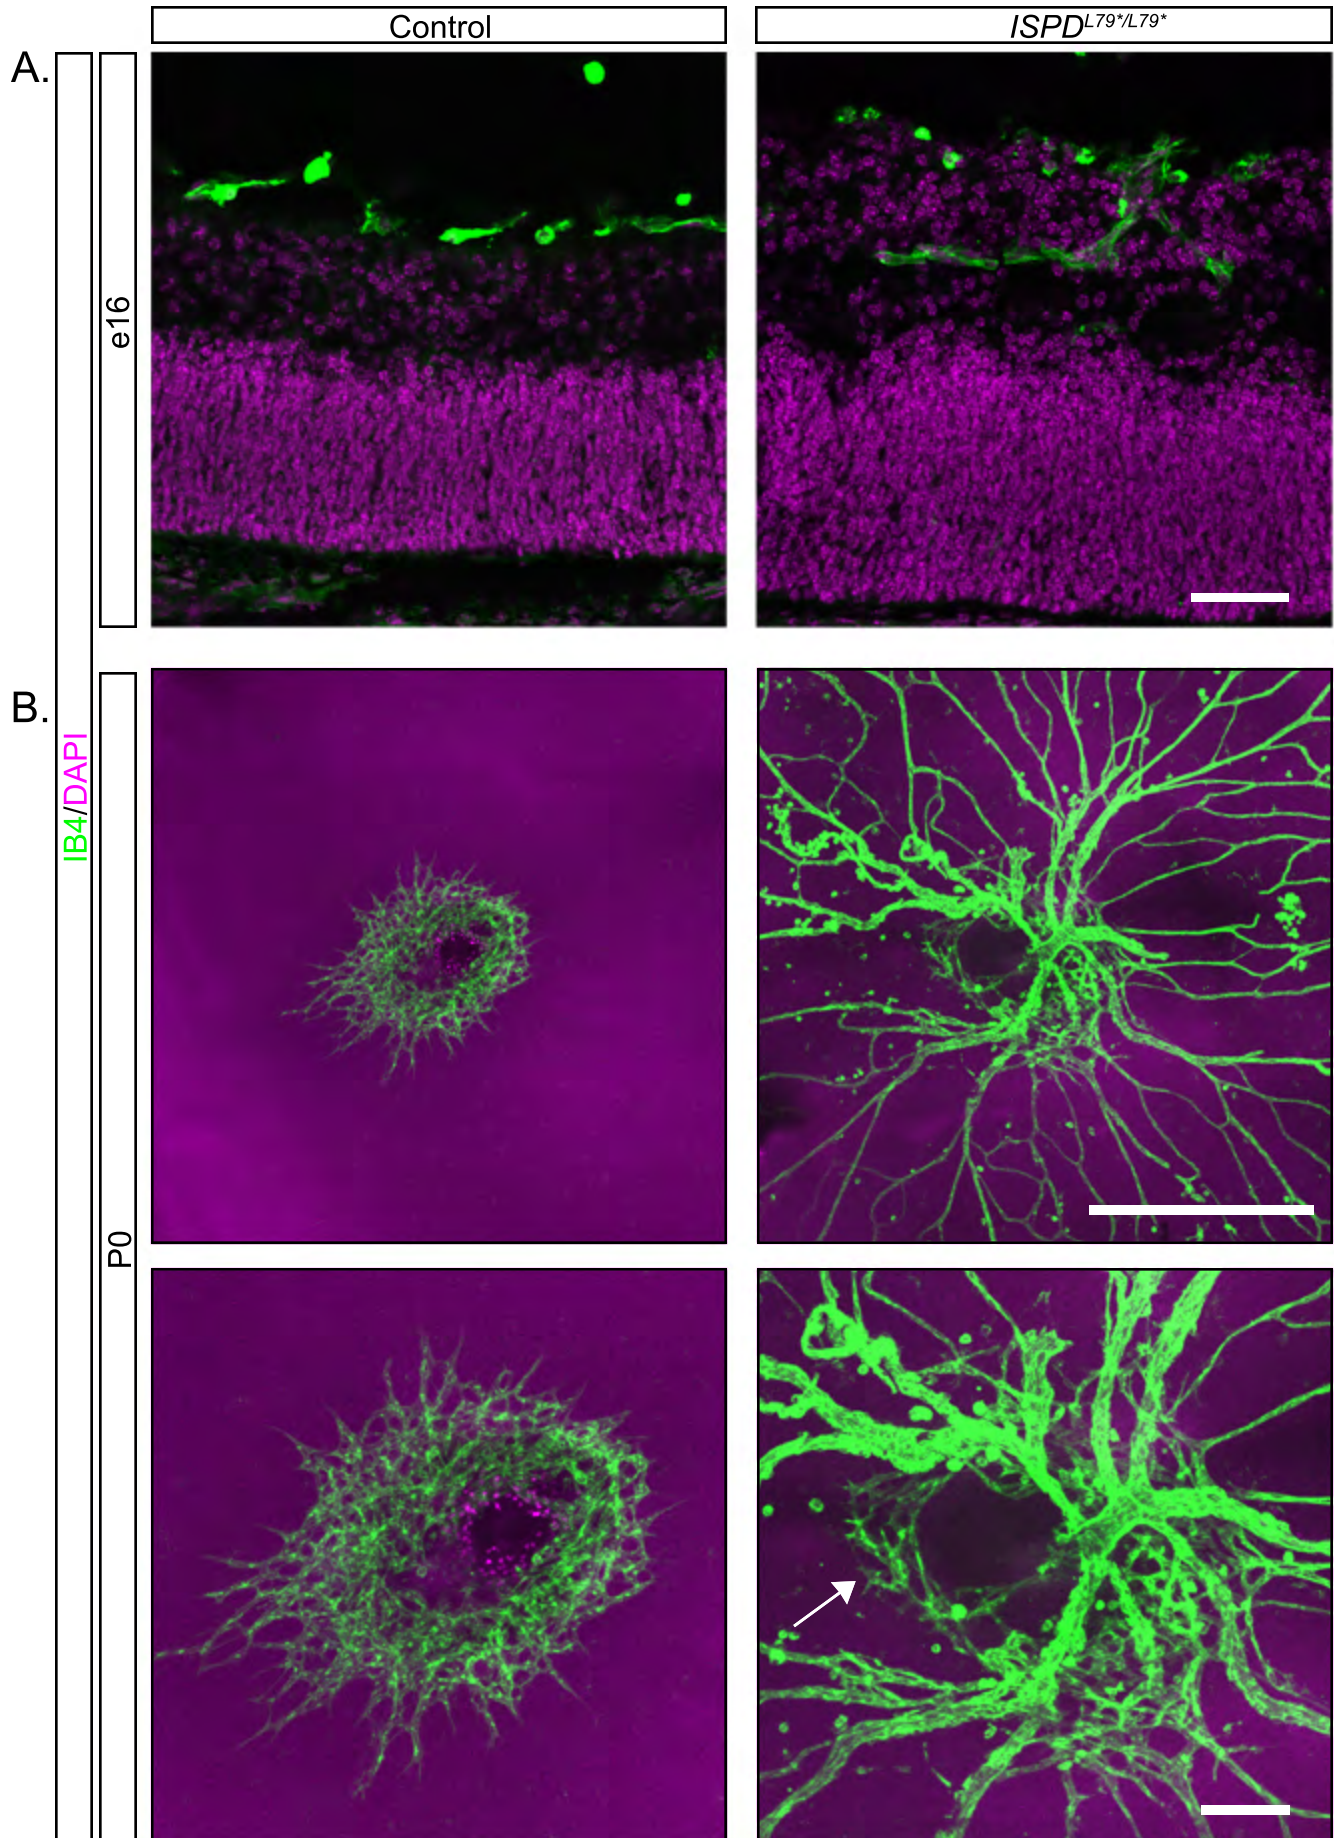

## Supplemental Figure 3

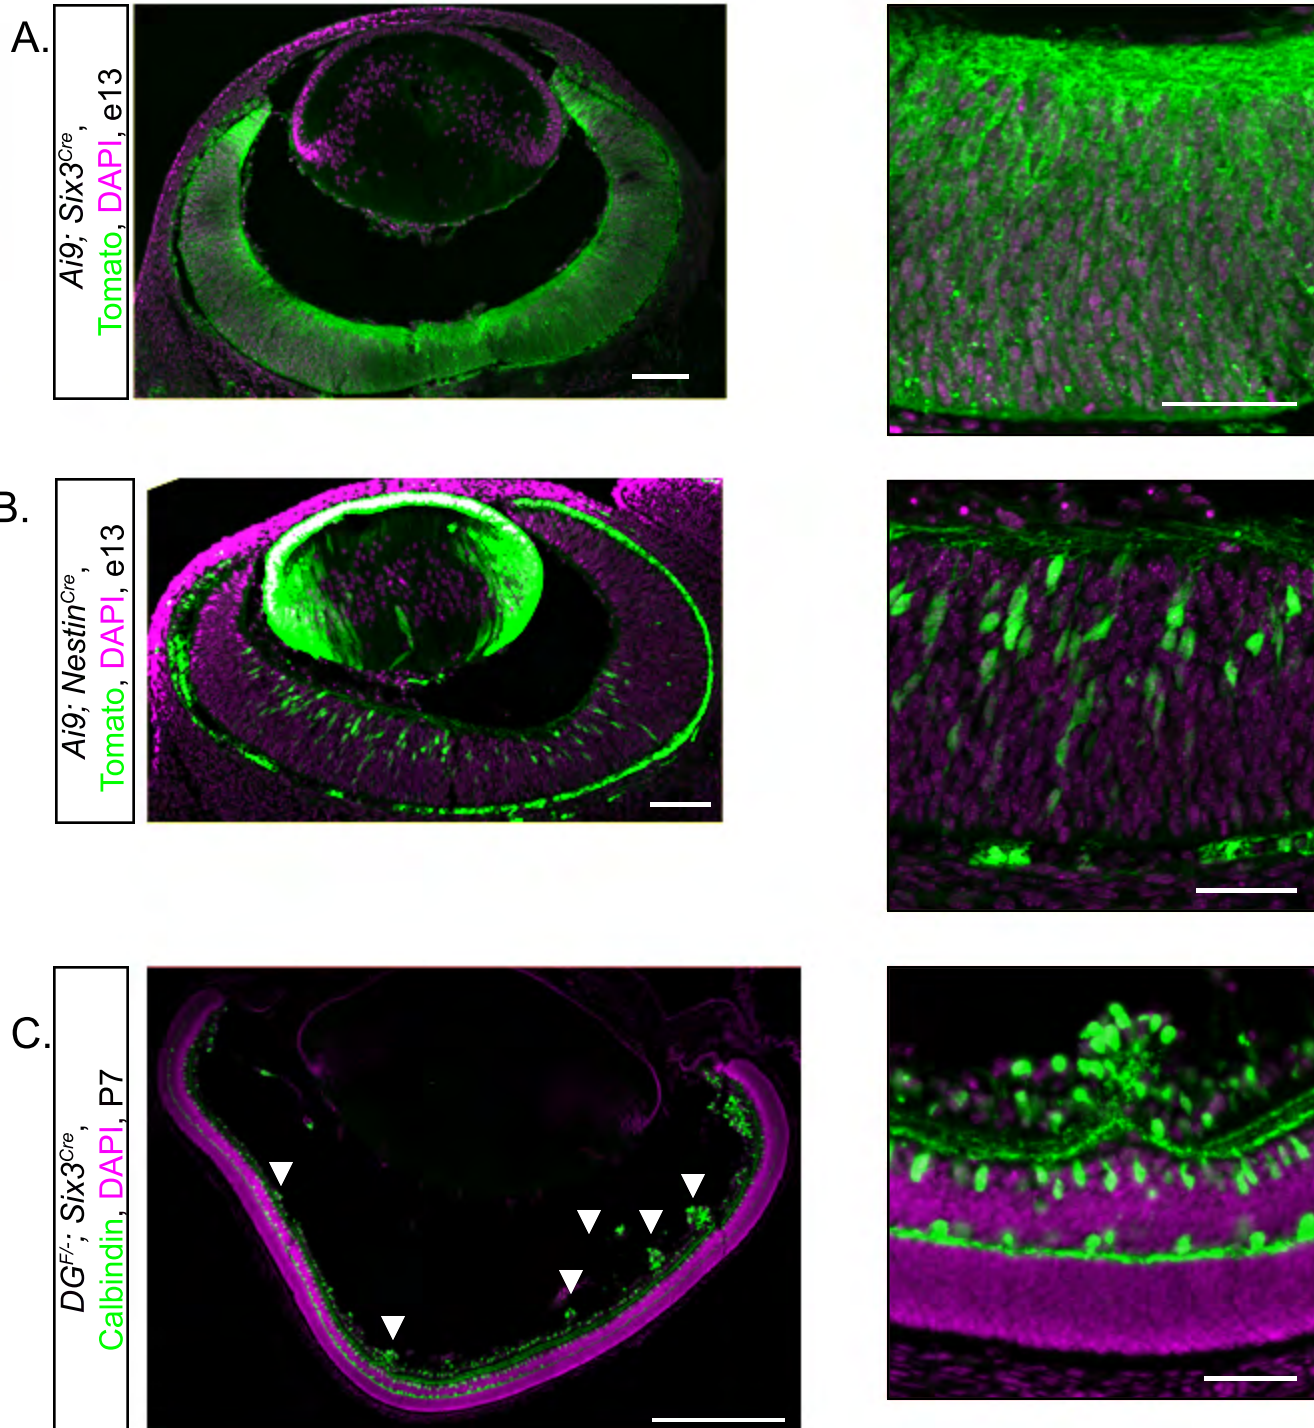

## Supplemental Figure 4

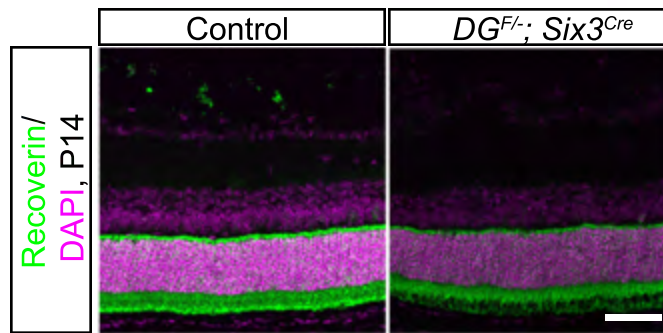

## Supplemental Figure 5

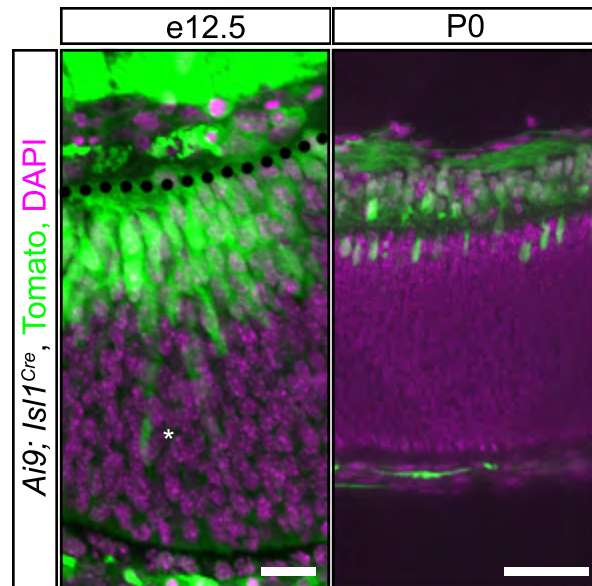

## Figure Legends

**Figure 1: The inner limiting membrane undergoes progressive degeneration in the absence of functional dystroglycan.** (A) Dystroglycan ( $\alpha$ -DG) is expressed throughout the developing retina, with an enrichment at the inner limiting membrane (ILM). Dystroglycan expression is lost in  $DG^{F/-}; Sox2^{Cre}$  mice (right). (B-D) The initial assembly of the ILM occurs normally in the absence of functional dystroglycan in (C)  $ISPD^{L79*/L79*}$  and (D)  $DG^{F/-}; Sox2^{Cre}$  retinas. The ILM in  $ISPD^{L79*/L79*}$  and  $DG^{F/-}; Sox2^{Cre}$  retinas undergoes progressive degeneration at e16 (middle) and P0 (right), and retinal neurons migrate into the vitreous. (E) Localization of multiple extracellular matrix proteins, including laminin (purple), collagen IV (red), and perlecan (green), is disrupted in the ILM in the absence of functional dystroglycan in  $ISPD^{L79*/L79*}$  retinas at P0. Arrowheads indicate ILM, asterisks indicate blood vessels. Scale bar, 50 $\mu$ m.

**Figure 2: Dystroglycan is required for intraretinal axon guidance** (A) L1 positive axons in the optic fiber layer (OFL) initially appear normal in  $ISPD^{L79*/L79*}$  (middle), and  $DG^{F/-}; Sox2^{Cre}$  retinas (right) at e13. (B, C) As the ILM degenerates in  $ISPD^{L79*/L79*}$  and  $DG^{F/-}; Sox2^{Cre}$  retinas at e16 (B) and P0 (C), axons hyperfasciculate (arrowhead) and exhibit gaps (asterisk) within the OFL. (D, E). Flat mount preparations from  $ISPD^{L79*/L79*}$  and  $DG^{F/-}; Sox2^{Cre}$  retinas at e16 (D) and P0 (E) show progressive disruption of axon tracts (Neurofilament, 2H3). Scale bar, 50  $\mu$ m.

**Figure 3: Disrupted circuit formation in the inner retina of postnatal dystroglycan mutants.** (A, B)  $DG^{F/-}; Six3^{Cre}$  (right) mice exhibit inner limiting membrane degeneration (top, purple, laminin) and abnormal axonal fasciculation and guidance (top, green, bottom, 2H3). (C-D) The cell bodies of bipolar cells (PKC, C, SCGN, D) exhibit normal lamination patterns, while their axons extend into ectopic cellular clusters in the ganglion cell layer. (E-H) Abnormal cellular lamination and disruptions in dendritic stratification of multiple amacrine and retinal ganglion cell types is observed in  $DG^{F/-}; Six3^{Cre}$  retinas. (E) ChAT labels starburst amacrine cells, (F) calbindin and (G) calretinin label amacrine and ganglion cells, and (H) GlyT1 labels glycinergic amacrine cells. Arrowheads indicate axons or cell bodies in ectopic clusters. Scale bar, 50  $\mu$ m.

**Figure 4: Dystroglycan is required for mosaic cell spacing in the ganglion cell layer.** (A, B). Horizontal cells (2H3) in flat mount P14 adult retinas have reduced cellular density, but normal mosaic cell spacing curves (Nearest neighbor analysis, Two-Way ANOVA, n=20 samples from 5 control retinas, 18 samples from 5 mutant retinas). (C, D) Mosaic cell spacing of starburst amacrine cells (ChAT) in the inner nuclear layer is normal (Nearest neighbor analysis, Two-Way ANOVA, n=10 samples from 3 control retinas, 10 samples from 3 mutant retinas), while the ectopic clustering of starburst amacrine cells in the ganglion cell layer results in a significant disruption of mosaic spacing (Nearest

neighbor analysis, Two-Way ANOVA, n=10 samples from 3 control retinas, 10 samples from 3 mutant retinas). Scale bar 100 $\mu$ m.

**Figure 5: Retinal thinning in *dystroglycan* mutants.** (A-D) P14 *DG<sup>F/-</sup>; Six3<sup>cre</sup>* retinas show decreased retinal thickness (DAPI,  $p < 0.01$ , n=7 control, 7 mutant), a decreased thickness of the photoreceptor layer (C, Recoverin, green,  $p < 0.01$ , n=7 control, 7 mutant) and no change in thickness of the bipolar cell layer (D, Chx10, purple,  $p > 0.05$ , n=7 control, 7 mutant). Starburst amacrine cell density is normal in both the GCL and INL (E, n=10 samples from 3 control retinas, 10 samples from 3 mutant retinas), while horizontal cells show a slight reduction in cell density (F) in P14 *DG<sup>F/-</sup>; Six3<sup>cre</sup>* retinas ( $p < 0.05$ , n=20 samples from 5 control retinas, 18 samples from 5 mutant retinas). (G,H) Ganglion cell density (RBPMS) is reduced by approximately 50% in P14 *DG<sup>F/-</sup>; Six3<sup>cre</sup>* retinas ( $p < 0.0001$ , n=12 samples from 3 control retinas, 12 samples from 3 mutant retinas). (I-J) Immunohistochemistry for cleaved caspase-3 in a flat mount preparation of P0 *DG<sup>F/-</sup>; Six3<sup>cre</sup>* retinas shows an increase in apoptotic cells. (t test,  $p < 0.05$ , n=18 samples from 6 control retinas, 17 samples from 6 mutant retinas). (J) Quantification of cleaved caspase-3 positive cells shows an increase in apoptotic cells at e16 (t test,  $p < 0.0001$ , n=18 samples from 6 control retinas, 18 samples from 8 mutant retinas) and P0 (I,J t test,  $p < 0.0001$ , n=18 samples from 6 control retinas, 15 samples from 5 mutant retinas) between control (left) and *ISPD<sup>L79\*/L79\*</sup>* (middle) retinas. Scale bar 50  $\mu$ m.

**Figure 6: Dystroglycan functions non-cell autonomously and does not require its intracellular signaling domain for retinal development.** (A) The ILM (laminin, purple) and axons in the OFL (2H3, green) appear similar to control in *DG<sup>F/-</sup>; Isl1<sup>cre</sup>* (middle panel) retinas and mice lacking the intracellular domain of dystroglycan (*DG<sup>-βcyt</sup>*) (right panel) retinas at P0. (B) Flat mount preparations show normal axon fasciculation (2H3) in *DG<sup>F/-</sup>; Isl1<sup>cre</sup>* (middle panel) retinas and *DG<sup>-βcyt</sup>* (right panel) retinas. (C-D) *DG<sup>F/-</sup>; Isl1<sup>cre</sup>* (middle panel) retinas (P14) and *DG<sup>-βcyt</sup>* (right panel) retinas (P28) have normal cellular lamination and dendritic stratification. Scale bar, 50  $\mu$ m.

**Figure 7: Dystroglycan is dispensable for synapse formation in the retina.** (A) Markers for outer retinal ribbon synapses (Ribeye, presynaptic and mGluR6, postsynaptic) appear structurally normal in the absence of dystroglycan. The density of (B) excitatory (VGLUT1) and (C) inhibitory (VGAT) presynaptic markers appear similar to control in the inner retinas of *DG<sup>F/-</sup>; Six3<sup>cre</sup>* mutants. Synapses are also present within ectopic clusters (asterisks). Scale bar, 50  $\mu$ m wide view, scale bar, 10  $\mu$ m enlarged view.

**Figure 8: Dystroglycan is dispensable for the generation and propagation of retinal waves.** (A-D) At P1, waves propagate normally across the retina in *DG<sup>F/+</sup>; Six3<sup>cre</sup>; R26-LSL-GCaMP6f* (A, C) and *DG<sup>F/-</sup>; Six3<sup>cre</sup>; R26-LSL-GCaMP6f* mice (B, D). Both small (A, B) and large (C, D) retinal waves are present at a similar frequency in *DG<sup>F/+</sup>; Six3<sup>cre</sup>; R26-LSL-GCaMP6f* and *DG<sup>F/-</sup>; Six3<sup>cre</sup>; R26-*

*LSL-GCaMP6f* retinas. (E) Distributions of wave areas show no difference between controls and mutants (Wilcoxon rank sum test,  $p > 0.05$ ). (F) Wave propagation rate is significantly slower in mutant retinas (Wilcoxon rank sum test,  $p < 0.05$ ). Wave parameters were calculated from 142 control waves obtained from 6 retinas from 3 control mice and 173 mutant waves obtained from 8 retinas from 5 mutant mice. Arrowheads indicate the initiation site of a retinal wave. Scale bar 500  $\mu\text{m}$ . Time displayed in milliseconds.

## Supplemental Figure Legends

**Supplemental Figure 1: Cellular migration defects encompass the entire retina in *ISPD<sup>L79\*/L79\*</sup>* mutants.** The ILM in *ISPD<sup>L79\*/L79\*</sup>* retinas undergoes degeneration (bottom panel) that is present across the entire span of the retina at e16. Laminin, green, DAPI, purple. Scale bar, 200  $\mu\text{m}$ .

**Supplemental Figure 2: Dystroglycan is required for normal vasculature development.** (A) IB4 labeled hyaloid vasculature is present in the vitreous adjacent to the GCL in control retinas (left) but is embedded within ectopic cell clusters *ISPD<sup>L79\*/L79\*</sup>* (right) retinas at e16. (B) Flat mount retinas at P0 show an ingrowth of the primary vascular plexus in controls (left top and bottom). In *ISPD<sup>L79\*/L79\*</sup>* retinas (right top and bottom), the ingrowth of the primary plexus into the retina is delayed (arrow) and there is a persistence of hyaloid vasculature. Scale bar 50  $\mu\text{m}$  A, 500  $\mu\text{m}$  B top, 100  $\mu\text{m}$  B bottom.

**Supplemental Figure 3: Deletion of *dystroglycan* throughout the developing retina results in migration defects.** (A) Recombination pattern of *Rosa26-lox-stop-lox-TdTomato; Ai9* reporter (green) by *Six3<sup>cre</sup>* shows expression throughout the retina and in axons at e13. (B). Recombination pattern of *Rosa26-lox-stop-lox-TdTomato; Ai9* (green) by *Nestin<sup>cre</sup>* shows expression in a sparse population of differentiated retinal neurons at e13. (C). Focal migration defects (arrowheads) in P7 *DG<sup>F/-</sup>; Six3<sup>cre</sup>* retinas are present across the entire span of the retina. Scale bar 100  $\mu\text{m}$  A, B, left, 500  $\mu\text{m}$  C, left, 50  $\mu\text{m}$  A, B, C, right.

**Supplemental Figure 4: Lamination of outer retina is normal in *dystroglycan* mutants.** Photoreceptors (recoverin, green) have normal lamination in P14 *DG<sup>F/-</sup>; Six3<sup>cre</sup>* retinas (right). Scale bar 50  $\mu\text{m}$ .

**Supplemental Figure 5: Recombination pattern of *Isl1<sup>cre</sup>* in the retina.** Recombination pattern of *Rosa26-lox-stop-lox-TdTomato; Ai9* reporter (green) by *Isl1<sup>cre</sup>* by shows expression in a large proportion of differentiated ganglion cells at e12.5 (left) and P0 (right). Dashed line indicates ILM. Asterisk notes a differentiated ganglion cell body that is still migrating toward the ILM. Scale bar 20  $\mu\text{m}$  left panel, scale bar 50  $\mu\text{m}$  right panel.
